1 **Systems analysis of gut microbiome influence on metabolic disease in HIV and high-risk**  
2 **populations**

3 Abigail J.S. Armstrong<sup>1,2</sup>, Kevin Quinn<sup>3</sup>, Sam X. Li<sup>1</sup>, Jennifer M. Schneider<sup>1</sup>, Nichole M.  
4 Nusbacher<sup>1</sup>, Katrina A. Doenges<sup>3</sup>, Suzanne Fiorillo<sup>1</sup>, Tyson J. Marden<sup>4</sup>, Janine Higgins<sup>5</sup>, Nichole  
5 Reisdorph<sup>3</sup>, Thomas B. Campbell<sup>1</sup>, Brent E. Palmer<sup>1#</sup>, Catherine A. Lozupone<sup>1#</sup>

6

7 Affiliations:

8 1. Department of Medicine, University of Colorado Denver, Anschutz Medical Campus, Aurora,  
9 CO, USA

10 2. Department of Immunology and Microbiology, University of Colorado Denver, Anschutz Medical  
11 Campus, Aurora, CO, USA

12 3. Skaggs School of Pharmacy and Pharmaceutical Sciences, University of Colorado Anschutz  
13 Medical Campus, 80045 CO, Aurora, USA

14 4. Colorado Clinical and Translational Sciences Institute; University of Colorado Anschutz Medical  
15 Campus, Aurora, Colorado, 80045. USA

16 5. Department of Pediatrics, Section of Endocrinology, University of Colorado Anschutz Medical  
17 Campus. Aurora, CO

18

19 # Corresponding authors

20 Brent E. Palmer: 303-724-7203; [brent.palmer@cuanschutz.edu](mailto:brent.palmer@cuanschutz.edu)

21 Catherine A. Lozupone: 303-724-7942; [catherine.lozupone@cuanschutz.edu](mailto:catherine.lozupone@cuanschutz.edu)

22 **Systems analysis of gut microbiome influence on metabolic disease in HIV and high-risk**  
23 **populations**

24

25 **Abstract**

26 Poor metabolic health, characterized by insulin resistance and dyslipidemia, is higher in people  
27 living with HIV (PLWH) and has been linked with inflammation, anti-retroviral therapy (ART) drugs,  
28 and ART-associated lipodystrophy (LD). Metabolic disease is associated with gut microbiome  
29 composition outside the context of HIV but has not been deeply explored in HIV infection nor in  
30 high-risk men who have sex with men (HR-MSM), who have a highly altered gut microbiome  
31 composition. Furthermore, the contribution of increased bacterial translocation and associated  
32 systemic inflammation that has been described in HIV-positive and HR-MSM individuals has not  
33 been explored. We used a multi-omic approach to explore relationships between gut microbes,  
34 immune phenotypes, diet, and metabolic health across ART-treated PLWH with and without LD;  
35 untreated PLWH; and HR-MSM. For PLWH on ART, we further explored associations with the  
36 plasma metabolome. Sixty-nine measures of diet, gut microbes, inflammation, and demographics  
37 were associated with impaired metabolic health defined using fasting blood markers including  
38 lipids, glucose and hormones. We found microbiome-associated metabolites associated with  
39 metabolic disease including the microbially produced metabolites, dehydroalanine and  
40 bacteriohopane-32,33,34,35-tetrol. Our central result was that elevated plasma  
41 lipopolysaccharide binding protein (LBP) was the most important predictor of metabolic disease  
42 in PLWH and HR-MSM, with network analysis of predictors showing that LBP formed a hub joining  
43 correlated microbial and immune predictors of metabolic disease. Our results suggest the role of  
44 inflammatory processes linked with bacterial translocation (measured by LBP) and interaction  
45 with dietary components and the gut microbiome in metabolic disease among PLWH and HR-  
46 MSM.

47

## 48 **Importance Statement**

49 The role of the gut microbiome in the health of HIV infected individuals is of interest because  
50 current therapies, while effective at controlling disease, still result in long term comorbidities.  
51 Metabolic disease is prevalent in HIV-infected individuals even in well-controlled infection.  
52 Metabolic disease has been linked with the gut microbiome in previous studies but little attention  
53 has been given to HIV infected populations. Furthermore, integrated analyses that consider gut  
54 microbiome composition together with data on diet, systemic immune activation, metabolites and  
55 demographic data have been lacking. By conducting a systems level analysis of predictors of  
56 metabolic disease in people living with HIV and men who are at high risk of acquiring HIV, we  
57 found that increased LBP, an inflammatory marker indicative of compromised intestinal barrier  
58 function, was associated with worse metabolic health. We also found this relationship to be  
59 associated with dietary, microbial, and metabolic factors suggesting a systemic gut microbiome  
60 influence on the presence of increased inflammatory markers which, in turn, influences the risk of  
61 metabolic disease. This work lays the framework for mechanistic studies aimed at targeting the  
62 microbiome and diet to prevent or treat metabolic endotoxemia in HIV-infected individuals.

63

## 64 **Keywords**

65 HIV; microbiome; men who have sex with men (MSM); metabolic disease

66

## 67 **Background**

68 The gut microbiome in people living with human immunodeficiency virus type 1(HIV) (PLWH) is  
69 of interest as a potential contributor to infection, disease progression, and development of co-  
70 morbidities. Poor metabolic health characterized by insulin resistance and dyslipidemia is frequent  
71 in PLWH (1-3) and has been linked with chronic inflammation (4-7) and several anti-retroviral  
72 therapy (ART) drugs (8). Metabolic disease is particularly prevalent in HIV-positive individuals  
73 with lipodystrophy (LD), a disease linked with early ART drugs that is manifested by lipoatrophy

74 in the face, extremities, and buttocks with or without visceral fat accumulation. LD can have a  
75 severe impact on the quality of life of PLWH and is associated with the development of diabetes  
76 and cardiovascular disease (9).

77

78 Metabolic disease has been linked with gut microbiome structure and function outside the context  
79 of HIV infection (10-14), but this relationship has not been explored deeply in PLWH. We and  
80 others have found an altered gut microbiome composition in both PLWH (15-17) and men who  
81 have sex with men at high-risk of contracting HIV (HR-MSM) (16, 18). Furthermore, we have  
82 demonstrated that the altered microbiome in HIV (15) and HR-MSM (15, 19) are pro-inflammatory  
83 both *in vitro* and/or in gnotobiotic mice (15, 19). This is of interest as peripheral inflammatory  
84 signals have been implicated in both cardiovascular disease risk (7, 20) and insulin sensitivity (4,  
85 5, 21-23) in PLWH. Increased peripheral immune activation in HIV-positive individuals is driven  
86 in part by bacterial translocation (24, 25), as indicated by higher levels of the bacteria product  
87 lipopolysaccharide (LPS) or LPS-binding protein (LBP) in blood. Increased blood LPS levels have  
88 also been observed in MSM and linked with recent sexual behavior (26). An association between  
89 LBP and metabolic disease in other diseases (e.g. hemodialysis patients) has been described  
90 (27), however there are mixed data regarding a role in obesity associated metabolic disease (28-  
91 30). Additionally, a recent study of metabolic syndrome in PLWH found greater immune  
92 dysfunction and a more HIV-associated microbiome associated with risk of metabolic syndrome  
93 (31).

94

95 We hypothesized that PLWH and HR-MSM with poor metabolic health would harbor a distinct gut  
96 microbial signature that was in turn also associated with elevated peripheral immune activation.  
97 We evaluated this relationship while considering other factors known to influence the microbiome,  
98 immunity and metabolic health. This analysis included typical diet; HIV, ART, and LD status; and  
99 other demographic characteristics such as age and body mass index (BMI). For HIV-positive

100 individuals on ART with and without LD, we further explored associations with the plasma  
101 metabolome (Figure 1). Our results suggest a central role of inflammatory processes linked with  
102 bacterial translocation as measured by LBP, and co-correlated intestinal microbes, dietary and  
103 demographic attributes in metabolic disease risk.

104

## 105 **Results**

### 106 Study Population

107 This study examined a cohort of 113 men, including men who have sex with women (MSW; n=22,  
108 19.5%) and men who have sex with men (MSM; n=91, 80.5%) (Table 1). Of the MSM, 32 were  
109 HIV-negative (35.2%), 14 were HIV-positive and not on ART (15.4%), and 45 were HIV-positive  
110 ART-treated (49.4%). The HIV-positive, treated group included those with lipodystrophy (LD;  
111 n=25, 55.6%) and those without (n=20, 44.4%). The HIV-negative MSM participated in activities  
112 that put them at high risk of contracting HIV as defined in a prior study of a candidate HIV vaccine:  
113 1) a history of unprotected anal intercourse with one or more male or male-to-female transgender  
114 partners; 2) anal intercourse with two or more male or male-to-female transgender partners; or 3)  
115 being in a sexual relationship with a person who has been diagnosed with HIV (32). In order to  
116 focus on HIV-associated metabolic disease, obese individuals (BMI >30) were excluded. There  
117 was no significant difference in BMI between the cohorts (Kruskal-Wallis test,  $p = 0.085$ ). HIV-  
118 positive, treated cohorts were significantly older than HIV-negative MSM and HIV-positive,  
119 untreated MSM (Kruskal-Wallis test,  $p < 0.001$ ). Age matching across all cohorts was not feasible  
120 in part because LD is associated with early-generation ART drugs and thus most common in older  
121 HIV-positive individuals and HR-MSM behavior as well as new HIV infections are predominantly  
122 in younger individuals. However, age is carefully considered in downstream analyses. All treated,  
123 HIV-positive individuals were on successful ART with suppressed viral loads (Table 1).

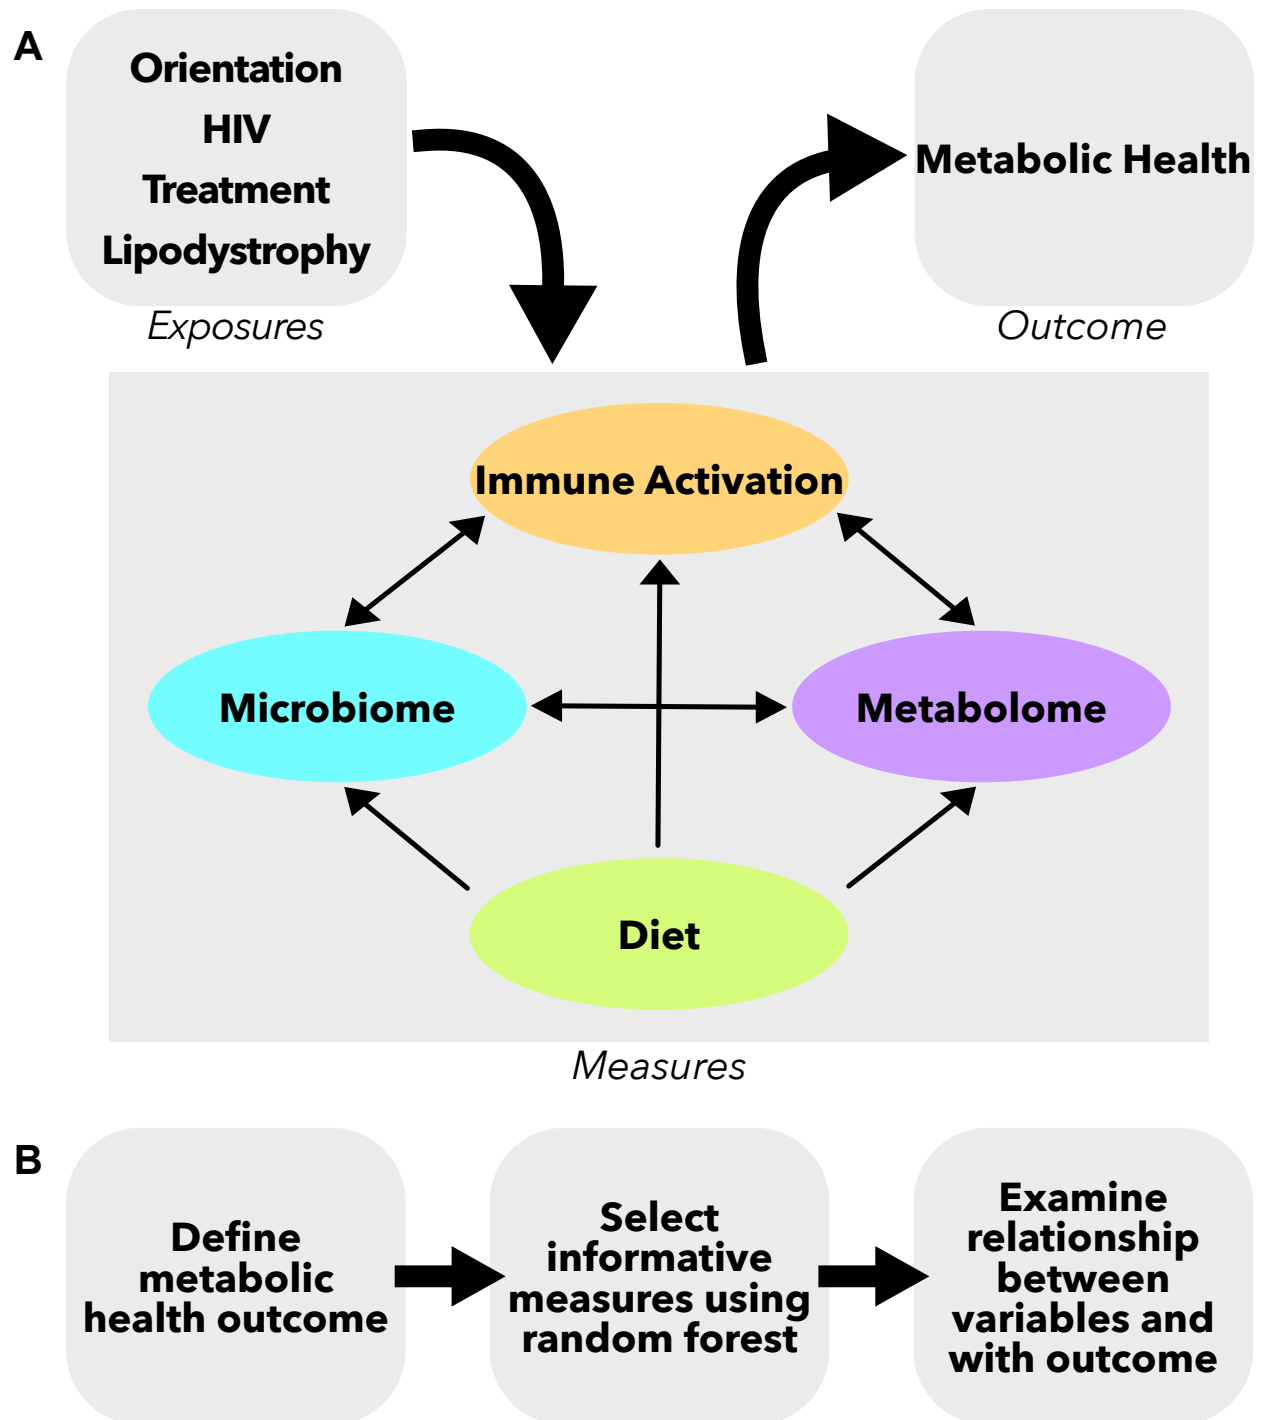

124  
125  
126  
127  
128  
129  
130

**Figure 1. Study design schematic.** Measures were collected from four compartments: gut microbiome, peripheral immune, diet questionnaire, and plasma metabolome. These separate compartments can all influence each other, forming complex systems that together influence metabolic health. Furthermore, the compartments can be influenced by other clinical and demographic characteristics such as HIV and treatment status. In this study we examine all of these measures together in order to investigate

131 **Table 1. Description of full study cohort**

|                                        | <b>HIV-negative MSW</b> | <b>HIV-negative MSM</b> | <b>HIV-positive MSM, untreated</b> | <b>HIV-positive MSM, treated</b> | <b>HIV-positive MSM, treated, with LD</b> |
|----------------------------------------|-------------------------|-------------------------|------------------------------------|----------------------------------|-------------------------------------------|
| <b>n</b>                               | 22                      | 32                      | 14                                 | 20                               | 25                                        |
| <b>Age (years)</b>                     | 33<br>(27.3-38.5)       | 34<br>(29.8-44.5)       | 34<br>(26.5-40.3)                  | 46<br>(42.8-50.5)                | 60<br>(54-64)                             |
| <b>BMI (kg/m<sup>2</sup>)</b>          | 25.2<br>(23.0-27.0)     | 25.5<br>(20.2-28.0)     | 21.4<br>(20.2-25.6)                | 23.9<br>(22.6-26.2)              | 25.8<br>(23.0-28.0)                       |
| <b>CD4 cell count</b>                  | NA                      | NA                      | 538<br>(408.5-731.8)               | 586<br>(419.5-878.0)             | 659<br>(550.0-908.0)                      |
| <b>Viral load</b>                      | NA                      | NA                      | 101,400<br>(20,300-292,514)        | 20<br>(0-20)                     | 0<br>(0-20)                               |
| <b>Cholesterol drugs/statins n (%)</b> | 2 (9.1%)                | 3 (9.4%)                | 1 (7.1%)                           | 4 (20%)                          | 14 (56%)                                  |

132 Numbers reported are median (IQR)

### 133 Metabolic Disease Score as a Marker for Metabolic Health

134 We measured seven common clinical markers of metabolic health from fasting blood:  
135 triglycerides, glucose, insulin, LDL, HDL, leptin, and adiponectin. Since these markers are often  
136 correlated with each other, we used principal component analysis (PCA) to define a single  
137 continuous measure of overall metabolic health of study participants, as has been done previously  
138 (Figure 2A) (33, 34). The first principal component (PC1) explained 28.8% of the variability within  
139 the clinical marker data and separated individuals by multiple correlated markers of metabolic  
140 disease. Specifically, individuals with higher values of PC1 generally had high triglycerides and  
141 low HDL, indicating dyslipidemia, and higher levels of fasting blood glucose and insulin, indicating  
142 insulin resistance (Figure 2A, Supplemental Figure 1). We thus decided to use values of PC1 as  
143 an outcome. Values of PC1 were shifted to a minimum of one and log transformed to define the  
144 metabolic disease score, which ranged from 0 as healthy and 2.5 as impaired. In order to  
145 determine how this score related to metabolic health, we performed regressions between the  
146 metabolic disease score and individual measures to define a metabolic score threshold that  
147 corresponded with clinically defined cutoffs for normal levels (Supplemental Figure 1). For  
148 example, triglycerides positively correlated with metabolic disease score and almost all individuals  
149 with a score above 1.45 had triglyceride levels in the unhealthy range of greater than 200 mg/dL.  
150 Similar patterns and cutoffs were true for HDL, LDL, and glucose (Supplemental Figure 1). The  
151 intersect of the regression with these cutoffs were all averaged to a single number of 1.4.  
152 Individuals below the cutoff were categorized as metabolically normal and those above were  
153 categorized as metabolically impaired.

154

155 When comparing the metabolic disease score across cohorts, we found that ART-treated, HIV-  
156 positive individuals with LD trended higher in both the average metabolic disease score and the  
157 proportion of individuals with scores in the metabolically impaired group but intergroup



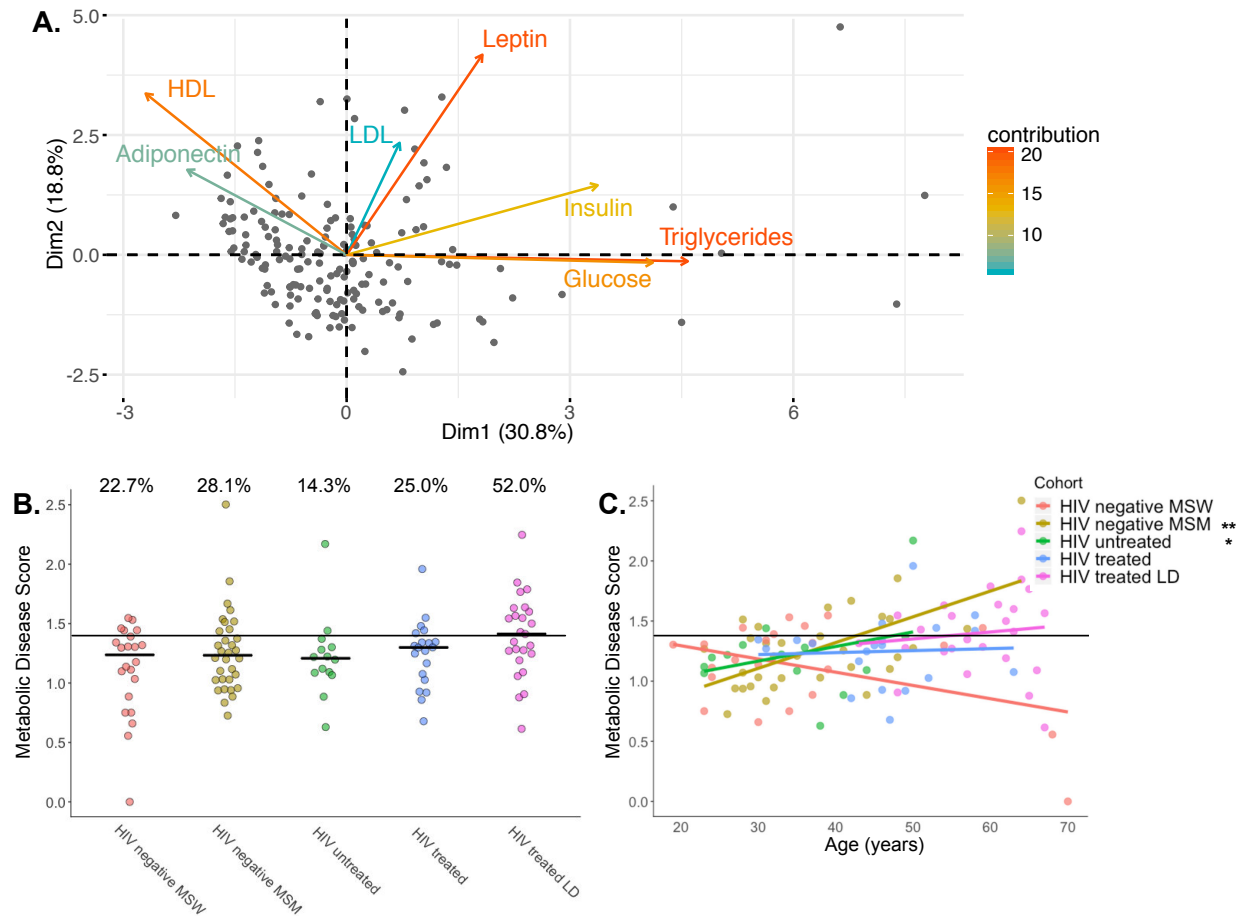

158  
159  
160  
161  
162  
163  
164  
165  
166  
167  
168  
169

**Figure 2. Metabolic disease score for marker of metabolic health.** **A.** PCA of metabolic measures in fasting blood of 164 men and women: 113 participants described in this paper along with 51 individuals recruited at the same time and under the same exclusion criteria as study participants. Metabolic disease score is calculated as the PC1 coordinates shifted to a minimum of one and log transformed. **B.** Metabolic disease scores broken up by cohort. The percentages noted above groups are the percent of individuals with a score above our metabolic impairment cutoff (Supplemental Figure 1). There is no significant difference between the proportions in each group (Fischer's exact test,  $p = 0.11$ ) or between mean ranks in each group (Kruskal-Wallis test  $p = 0.13$ ). **C.** Relationships between metabolic disease score and age stratified by cohort. Statistical significance of slopes are indicated and were calculated with the linear model:  $\text{score} \sim \text{age} + \text{cohort} + \text{age} * \text{cohort}$ . P-value annotations: \*\* < 0.01; \* < 0.05.

170 significance was lost after multiple test corrections (Figure 2B). Furthermore, because our HIV-  
171 positive, treated cohorts were significantly older than our HIV-negative MSM and HIV-positive,  
172 untreated MSM, we used a linear model to explore differences in the metabolic disease score  
173 across cohorts while accounting for age (Figure 2C). This score was positively associated with  
174 age only in HIV-negative MSM and HIV-positive, untreated MSM (Figure 2C; linear model;  $p <$   
175  $0.001$  and  $p = 0.036$  respectively) and only HIV-negative MSM had significantly higher  
176 metabolic disease score compared to HIV-negative MSW when accounting for age (linear  
177 model;  $p < 0.001$ ).

178

### 179 Selection of Features that Predict the Metabolic Disease Score and Interactions Between 180 Selected Features

181 To explore the complex relationships of the gut microbiome, peripheral immune activation, and  
182 diet to the metabolic disease score and to each other, we first selected features that were  
183 important predictors of the metabolic score using the tool VSURF (Variable Selection Using  
184 Random Forest) tool (35). The VSURF implementation of random forest is optimized for feature  
185 selection, returning all features that are highly predictive of the response variable, even when a  
186 smaller subset of highly predictive variables with redundant features removed could be just as  
187 accurate for prediction (35). We input the following features into the VSURF tool: 1) 130 microbial  
188 features (99% identity Operational Taxonomic Units (OTUs) with highly co-correlated OTUs  
189 binned into modules as described in the methods (detailed in Supplemental Table 1) and filtered  
190 to OTUs only in  $>20\%$  of samples). 2) 21 immune features that were measured in plasma using  
191 multiplex ELISA (detailed in Supplemental Table 2). These immune measures were selected  
192 based on a literature search for those previously shown to be altered in HIV infection and/or  
193 metabolic disease. 3) 21 clinical/demographic features that were collected in questionnaires or  
194 measured in study participants such as age, BMI, HIV infection and treatment status, typical  
195 gastrointestinal symptoms including constipation, diarrhea and bloating, and sexual behavior

196 (detailed in Supplemental Table 3). 4) 29 dietary features that were collected using a food  
197 frequency questionnaire of typical dietary intake over the prior year as detailed in the methods.

198  
199 From the initial 201 measures, VSURF identified 69 important variables (four clinical data  
200 measures, six diet measures, 14 immune measures, 45 microbes) and a subset of ten highly  
201 predictive variables (Supplemental Table 4). These 69 features were sufficient to accurately  
202 predict metabolic disease score using traditional random forest (linear model:  $r^2 = 31.05\%$ ,  $p <$   
203  $0.001$ ). Additionally, permutation testing revealed that VSURF performed better at selecting  
204 explanatory variables than a null model where the outcome was randomly permuted (permutation  
205 test;  $p = 0.049$ , Supplemental Figure 2). We found that 21 of the 69 selected variables were  
206 positively or negatively correlated with the metabolic disease score, indicating either increased or  
207 decreased risk respectively (Spearman rank correlation, FDR  $p < 0.1$ , Supplemental Table 4).  
208 Since random forest can detect non-linear relationships and/or features that are only important  
209 when also considering another feature, it is not surprising that all features were not correlated  
210 linearly with the metabolic disease score.

211  
212 All VSURF selected clinical measures were positively correlated with metabolic disease score  
213 and included age, BMI, lipodystrophy, and bloating (Supplemental Table 4). None of the six  
214 selected diet measures correlated with metabolic disease score (Supplemental Table 4). VSURF  
215 selected several inflammatory immune measures that were positively correlated with metabolic  
216 disease score: LBP, intercellular adhesion molecule 1 (ICAM-1), interleukin (IL) 16, IL-12, and  
217 granulocyte-macrophage colony-stimulating factor (GM-CSF) (Supplemental Table 4). The most  
218 important feature as determined by random forest importance score was LBP.

219  
220 Diet, the microbiome, and immune phenotypes can all influence each other (Figure 1). They can  
221 also relate to the measured clinical/demographic factors that we had identified as predictors of

222 the metabolic disease score such as BMI and age. For this reason, we also investigated the  
223 relationship between the 69 important factors using pairwise Spearman rank correlation and  
224 network visualization (Figure 3, Supplemental Figure 3, Supplemental Table 5). This approach  
225 revealed many within data type associations such as positive correlations within many selected  
226 dietary, microbiome, and immune features. It also identified correlations between data types such  
227 as a negative relationship between LBP and several Gram-negative bacteria or a positive  
228 correlation between age and immune measures such as LBP or IL-6 (Figure 3A, Supplemental  
229 Table 5).

230

231 The selected important microbes included many that positively or negatively correlated with the  
232 metabolic disease score (Supplemental Table 4) and that were highly co-correlated with each  
233 other and with dietary, clinical/demographic, and inflammatory phenotypes (Supplemental Figure  
234 3A, Supplemental Table 5). For example, a module of bacteria identified within the *Prevotella*  
235 genus and the *Paraprevotellaceae* family, negatively associated with metabolic disease score  
236 and positively associated with dietary fiber (Supplemental Figure 3B). Because bacterial  
237 translocation is known to occur at increased levels in both HIV-positive individuals (36) and HR-  
238 MSM (26), we were specifically interested in looking at the selected microbes and other features  
239 that correlated with LBP, a marker of bacterial translocation. The network of LBP neighbors is  
240 shown in Figure 3B. All of the microbes correlating with LBP were classified to the order  
241 *Clostridiales*. More specifically, LBP is negatively correlated with several butyrate or putative  
242 butyrate producing bacterial/bacterial modules such as OTUs in the genera *Coprococcus* (37, 38).  
243 LBP was also positively correlated with *Dorea* species (Supplemental Table 5).

244

245 In addition to correlations, we evaluated interactions between variables using the tool iRF  
246 (iterative Random Forest)(39). These interactions represent variables that are in adjacent nodes

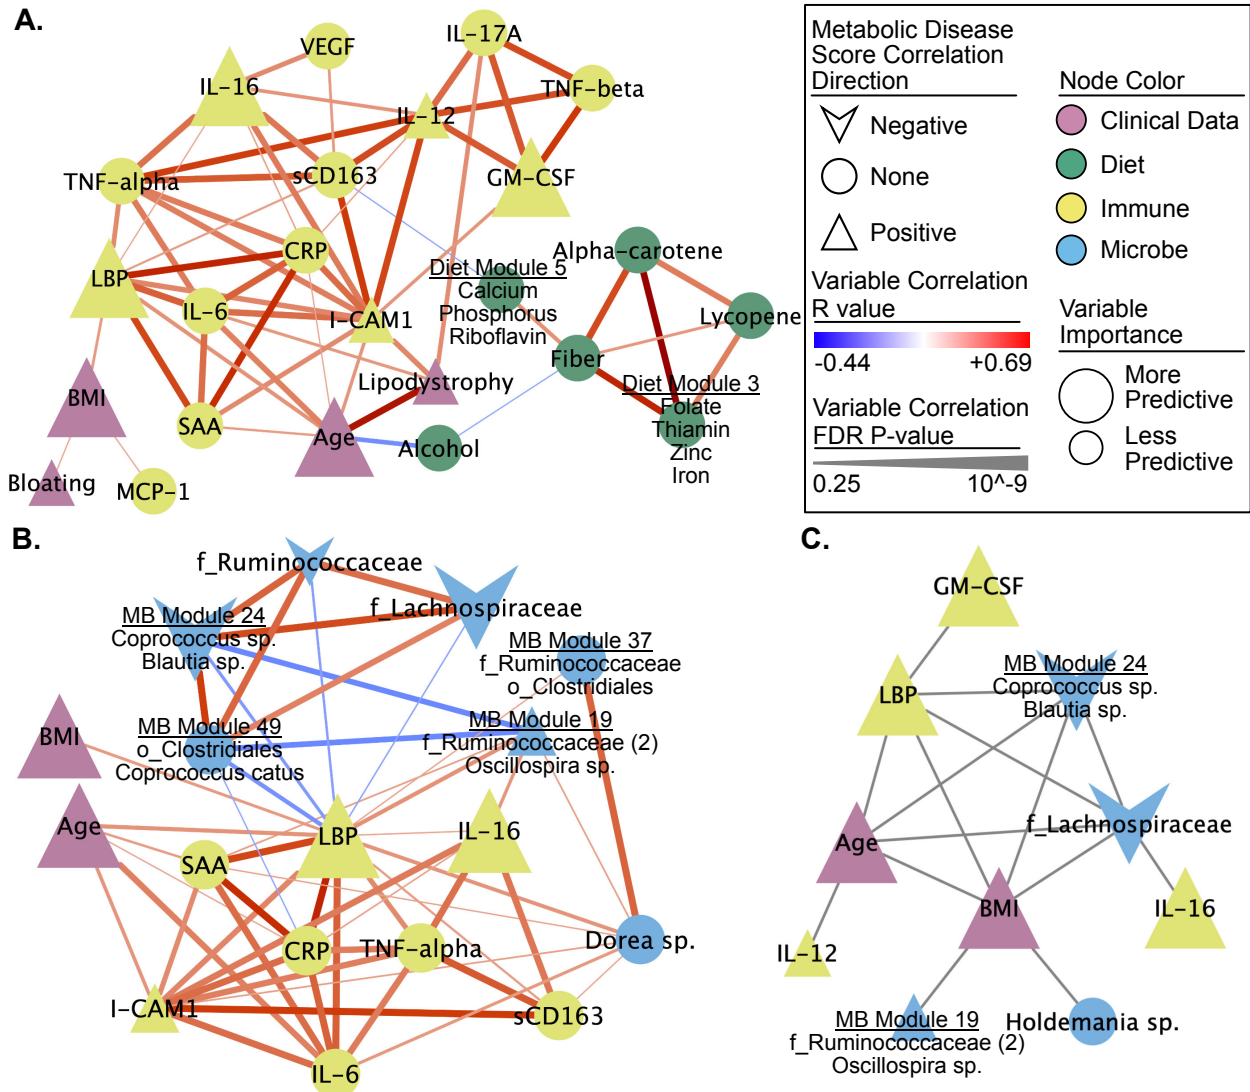

247  
 248 **Figure 3. Networks of selected measures reveal several strong associations with**  
 249 **metabolic disease score and between measures.** Correlation sub-networks of **A.** all the non-  
 250 non-microbe selected measures. **B.** the nearest neighbors of LBP. All Spearman rank correlations  
 251 with an FDR  $p < 0.25$  are shown. Subnetworks were pulled from a larger network of all VSURF  
 252 selected measures (Supplemental Figure 3, Supplemental Table 2). **C.** Network of interactions  
 253 between measures calculated using iRF. All edges represent an interaction (i.e. proximity in a  
 254 decision tree) that occurred in 30% or more of the decision trees.

255 in a random forest tree in which the value of one influences the predictability of the other.  
256 Interactions between variables in more than 30% of the trees were kept for further analysis (Figure  
257 3C). This analysis identified a group of 5 interactive features: LBP, age, BMI, an OTU in the  
258 *Lachnospiraceae* family, and microbiome module 24 (*Coprococcus* sp. and *Blautia* sp.). These  
259 features were also significantly correlated with LBP and suggest a subset of features that when  
260 taken together may be predictive of metabolic disease risk.

261

262 The Plasma Metabolome as a Potential Mechanism of Microbial Influence on Metabolic Disease  
263 Score in ART-treated HIV-positive Individuals with and without LD

264 To pursue a further mechanistic understanding of how the gut microbiome may influence the  
265 metabolic disease score in PLWH, we performed untargeted metabolomics (LC/MS) on plasma  
266 from our cohort of ART-treated, HIV-positive individuals with and without LD (n=44). Metabolite  
267 identities were then validated using untargeted MS/MS. We used two approaches to determine  
268 which plasma metabolites were either directly produced or indirectly influenced by the presence  
269 of a microbiome. First, metabolites found in the human plasma were run through the  
270 computational tool AMON (40), which uses the KEGG database (41) and inferred metagenomes  
271 (calculated using PICRUSt2 (42)) to determine which of the measured metabolites could have  
272 been produced by the microbiome. Second, plasma from both germ free (GF) and humanized  
273 mice was analyzed using metabolomics to determine metabolites that had significantly altered  
274 levels in mice with human microbiomes compared to GF mice, i.e. microbiome influenced  
275 metabolites. For this purpose, GF mice were gavaged using fecal samples from eight men from  
276 the study cohort (humanized mice) while two mice were gavaged using PBS as control  
277 (Supplemental Table 6). Plasma was collected before and after gavage. All mice were fed a high-  
278 fat western diet.

279

280 We found that 820 metabolites were different in abundance between GF and humanized mice  
281 after multiple test corrections (Student's t-test, FDR  $p < 0.05$ ), 493 of which were also present in  
282 the human plasma samples. However, only 376 of these 493 metabolites could be annotated (see  
283 Methods and Supplemental Table 7) while the remaining 148 were only assigned a mass. From  
284 the full set of 5,332 metabolites identified in the human plasma, 416 were able to be annotated  
285 with KEGG IDs. These were further analyzed using AMON. 146 microbiome-associated  
286 metabolites were identified that are putatively produced by the gut microbiome; however, many  
287 of these could also be produced by the host. Twenty-six of the 134 microbiome-associated  
288 metabolites identified by AMON were also identified in the gnotobiotic mouse analysis  
289 (Supplemental Table 7).

290  
291 Of the 5,332 total measured metabolites in the human samples, 150 correlated with metabolic  
292 score (Spearman rank correlation, FDR  $p < 0.05$ ; Supplemental Table 8). Of these 68 could not  
293 be annotated. The annotated correlated compounds were enriched in a number of different  
294 metabolic pathways with both the Phospholipid and the Glycerolipid pathways of the Small  
295 Molecule Pathway Database (SMDPH)(43) being highly enriched (Supplemental Table 9).  
296 Consistent with the metabolic score being defined in part by dyslipidemia, 17 of the significant  
297 compounds were annotated as triglycerides. Of the 150 correlated metabolites, seven were  
298 associated with the microbiome either because they were predicted microbial products of the gut  
299 microbiome (as determined with AMON (40)), because they were significantly different while  
300 comparing the metabolome of germ-free mice to that of mice colonized with the feces of study  
301 participants, or by literature search. We confirmed the identity of 5 of the 7 of these with MS/MS  
302 (Supplemental Table 8). Of these seven microbiome-associated metabolites, two could  
303 exclusively be explained by direct production by the microbiome. Specifically, dehydroalanine was  
304 identified as a microbial product with AMON and negatively correlated with metabolic disease  
305 score (Supplemental Table 8). Bacteriohopane-32,33,34,35-tetrol is a bacterial metabolite that

306 positively correlated with the metabolic disease score. Two additional microbiome-associated  
307 compounds were triglycerides (TG(54:6) and TG (16:0/18:2.20:4)) that were positively correlated  
308 with metabolic disease score and elevated in humanized mice compared to GF mice. Another of  
309 these metabolites, 1-Linleoyl-2-oleoyl-rac-glycerol is a 1,2-diglyceride in the triglyceride  
310 biosynthesis pathway. Finally, phosphatidylcholine (PC(17:0/18:2)) and  
311 phosphatidylethanolamine (PE(20:3/18:0)) compounds were identified as microbiome associated  
312 and positively and negatively correlated with the metabolic disease score respectively (44).

313

## 314 **Discussion**

315 In this study, we identified several bacterial, diet, and immune measures that predicted higher  
316 metabolic disease score in a cohort of MSM with and without HIV, ART, and LD. Notably, we  
317 identified a strong relationship between circulating LBP and higher metabolic disease score which  
318 in turn correlated with other markers of systemic inflammation, a loss of beneficial microbes such  
319 as Gram-positive, butyrate-producing bacteria, and higher BMI, indicating that diverse modifiable  
320 factors may influence LPS/inflammation driven metabolic disease in this population.

321

322 There was a positive association between metabolic disease score and age, as has been reported  
323 previously for non-HIV populations (45), but linear modeling suggested that this relationship was  
324 driven by an association in HIV-negative MSM and HIV-positive untreated MSM in our study,  
325 revealing a possibly larger effect size than in our other cohorts. Also, when controlling for age,  
326 HIV-negative and positive untreated MSM had the highest metabolic disease score, even  
327 compared to HIV positive individuals on ART with LD, a population that has previously been  
328 reported to have higher incidence (46). This result is intriguing given our results supporting a role  
329 for LBP driven inflammation in metabolic disease and prior research linking increased levels of  
330 LPS in blood with high-risk behavior in MSM (26). Larger cohorts and more detailed behavior



331 information are required, however, to make any definitive claims on impaired metabolic health in  
332 ageing in HR-MSM.

333

334 Consistent with prior studies that have associated high BMI with dyslipidemia, insulin resistance,  
335 and/or metabolic syndrome (9, 47, 48), BMI was a positive predictor of metabolic disease score  
336 in our cohort even though our study excluded obese individuals, but did include overweight. This  
337 suggests the importance of weight management even among overweight, non-obese individuals  
338 as a strategy for reducing metabolic health impairment in this population.

339

340 We did not find a positive association between ART treatment status and metabolic disease score,  
341 but this may be because individuals in our study were on a wide variety of drug combinations with  
342 the potential to have varied/contrasting effects. For instance, both integrase strand transfer  
343 inhibitors (ISTI) (49) and regimens including the nucleoside reverse transcriptase inhibitor (NRTI)  
344 tenofovir have been shown to increase risk of weight gain (50). Conversely, the CCR5 antagonist,  
345 maraviroc, may confer a benefit to cardiovascular function and body weight maintenance and  
346 evidence in mice suggests that this may be linked to differences in gut microbiome composition  
347 with treatment (21, 51). Thus, future studies more targeted to particular ART regimes will be  
348 required to look at factors important in particular drug contexts.

349

350 Several of the dietary components identified as important predictors of metabolic disease score  
351 in our cohort have been previously associated with metabolic health, including dietary carotenoid,  
352 lycopene, and fiber (52-56). Fiber's benefit in glucose response has been linked with the activity  
353 of *Prevotella copri*. Individuals who had improved glucose response upon 3 days of a high-fiber  
354 diet consumption were characterized by a higher increase in *P. copri* (55) and beneficial effects  
355 of *P. copri* were confirmed in mice fed a high-fiber diet (55). Interactions between *Prevotella*,  
356 dietary fiber, and metabolic health were of particular interest in this cohort of HIV positive and

357 negative MSM since these individuals have much higher *Prevotella*, including *P. copri*, than in  
358 non-MSM (16, 18). However, other published studies suggested that high *Prevotella* might predict  
359 increased risk of metabolic disease. One group observed that *P. copri* in mice fed a western diet  
360 low in fiber could promote poor glucose response through the production of branched chain amino  
361 acids (BCAAs) (12). Additionally, our prior study using *in vitro* stimulations of human immune cells  
362 with fecal bacteria of HIV positive and negative MSM indicated that the *Prevotella*-rich  
363 microbiomes of MSM could drive systemic inflammation (15). Interestingly, in our data, a module  
364 of three OTUs, two of which are identified as within the genus *Prevotella* and the other within the  
365 family *Paraprevotellaceae*, negatively associated with metabolic disease score and positively  
366 associated with dietary fiber (Supplemental Figure 3B), supporting a relationship between  
367 particular *Prevotella* strains and dietary fiber towards improved metabolic health, and not  
368 supporting deleterious effects. Further work will be needed to decompose the complex  
369 relationship between dietary fiber, particular *Prevotella* strains, and metabolic health in HIV  
370 positive and negative MSM with unique *Prevotella*-dominated communities.

371  
372 LBP was the most important feature in the random forest analysis and also a highly interactive  
373 measure in the iRF analysis. LBP binds to both microbial LPS and lipoteichoic acid (LTA) in the  
374 blood (57) and the presence of elevated LBP is indicative of increased intestinal barrier  
375 permeability (58). LBP levels were correlated with other inflammatory markers that have been  
376 linked with worse metabolic health in HIV-negative populations suggesting a role as a central  
377 mediator of metabolic-disease associated immune phenotypes. These included 1) I-CAM 1,  
378 whose expression in adipose tissue has been associated with diet-induced obesity in mice (59)  
379 and metabolic syndrome in humans (60) 2) IL-6, a pro-inflammatory cytokine that has been shown  
380 to play a direct role in insulin resistance (61), and 3) SAA, which is regulated in part by IL-6 and  
381 plays a role in cholesterol metabolism (60); SSA3 specifically has been shown to be produced in  
382 response to gut bacteria in obesity mice (62). We observed a positive association between

383 metabolic disease score and frequency of abdominal bloating, further supporting a role of  
384 intestinal dysfunction in this population. Taken together these associations suggest that  
385 inflammation originating from an impaired intestinal barrier is promoting worse metabolic health.

386

387 Although prior studies have connected LBP-associated inflammation with worse metabolic health  
388 (27, 28, 63); the strength of this relationship is disease specific with less clear results in obesity-  
389 associated metabolic disease (29, 30). An importance of bacterial translocation in HIV-associated  
390 metabolic syndrome was demonstrated in a recent study of metabolic comorbidities in HIV-  
391 positive individuals which found that lower CD4 nadir and/or AIDS events, HIV-associated  
392 microbiota, and low alpha diversity was correlated with increases in sCD14 and LBP and increase  
393 risk of metabolic syndrome (31). Additionally, in our study LBP was correlated with age and BMI,  
394 a relationship that was previously observed in a cohort of HIV-negative men of African ancestry  
395 with this trio being further associated with adiposity and pre-diabetes (64). Lastly, the negative  
396 association of LBP with putative butyrate producing bacteria suggests that a lack of microbes that  
397 promote intestinal barrier integrity contributes to increased intestinal permeability and thus  
398 microbial components in circulating blood.

399

400 In our metabolomic analysis, we identified 150 metabolites in blood that correlated with metabolic  
401 disease score. In order to identify compounds whose prevalence may be related to the gut  
402 microbiome we used two complimentary approaches. First, we predicted which of these  
403 compounds could have been produced by the microbiome using information in KEGG and the  
404 bioinformatics tool AMON (40). Second, we measured which compounds changed in relative  
405 abundance in germ-free versus mice colonized with feces from our study cohort. The AMON  
406 analysis allows us to specifically evaluate which compounds could have been directly produced  
407 by the gut microbiome but is limited by a lack of KEGG annotations for many compounds (40).  
408 The gnotobiotic mouse experiments can identify microbial influence in unannotated compounds

409 but cannot differentiate between direct production/consumption by microbes versus indirect  
410 influence. The results will also be influenced by physiological differences between mice and  
411 humans and the incomplete colonization of human microbes in humanized mice. Although these  
412 weaknesses may have led us to underestimate which of the 150 metabolic disease associated  
413 compounds may have been related to the microbiome, it still identified compounds that supported  
414 a mechanistic link between gut microbes, metabolites, and metabolic disease in HIV-infected  
415 individuals on ART.

416

417 Firstly, we found a negative correlation between the microbially-produced non-canonical amino  
418 acid, dehydroalanine, and metabolic disease score. Dehydroalanine is a component of lantibiotics  
419 that are active against Gram-positive bacteria. We observed Gram-positive *Dorea* to positively  
420 correlate with LBP, suggesting a role of lantibiotics in regulating our proposed LBP-centered  
421 metabolic disease in this population.

422

423 Secondly, we observed that bacteriohopane-32,33,34,35-tetrol positively correlated with the  
424 metabolic disease score. This compound has been found to be a lipoxygenase inhibitor that  
425 prevents the formation of hydroxyicosatetraenoic acid and various leukotrienes from arachidonic  
426 acid (65), which have been linked with the development of cardiovascular disease and metabolic  
427 syndrome (66). This association of a potentially protective metabolite increased in metabolic  
428 impairment seems counterintuitive; however, it may be indicative of larger systemic changes in  
429 arachidonic acid metabolism and is worthy of further exploration.

430

431 Thirdly, we identified a PC and a PE associated with both the microbiome and metabolic disease  
432 score. Changes in PCs and/or PEs have been previously implicated in atherosclerosis, insulin  
433 resistance and obesity (44). AMON analysis indicated that both PCs and PEs can be synthesized  
434 by intestinal bacteria; however, these compounds can also be synthesized in the host and may

435 be found in the diet. In our analysis, PE(18:1/20:1) levels were higher in colonized compared to  
436 germ-free mice indicating that intestinal bacteria do influence overall levels despite diverse  
437 potential sources.

438

439 Lastly, we observed increased levels of several plasma triglycerides in the humanized compared  
440 to germ-free mice, including two plasma triglycerides that were significantly associated with  
441 metabolic disease score. This confirms the influence of the gut microbiome on host plasma  
442 triglycerides (67-69). However, we did not find any strong associations between these  
443 triglycerides and specific microbes within our dataset, indicating a potential need for studies  
444 conducted in larger cohorts or with shotgun metagenomics to look for functional correlates.

445

446 In conclusion, we observed a relationship between diet, gut microbiome, plasma metabolome,  
447 and peripheral immune markers of inflammation and metabolic disease in MSM. These data pull  
448 together several previously described relationships between pairs of these compartments  
449 observed in other populations. However, in this work we demonstrate both a novel collection of  
450 measures (microbiome, peripheral immune signaling, peripheral metabolites, demographic and  
451 diet information) and a novel approach for integrating several host compartments in order to  
452 examine a more complex system and applied it to the little studied population of HIV negative and  
453 positive MSM with and without LD. Our results suggest that an overall gut environment driven by  
454 low fiber, key vitamins, and microbes that promote intestinal barrier integrity and high in potentially  
455 pathogenic bacteria may work in conjunction to increase levels of LBP and other inflammatory  
456 cytokines to drive poor metabolic health. These results illuminate potential microbiome-targeted  
457 therapies and personalized diet recommendation given an interacting set of gut microbes and  
458 other host factors. Understanding these relationships further may provide novel treatments to  
459 improve the metabolic disease and inflammatory outcomes of MSM living with HIV.

460

## 461 **Methods**

### 462 Subject Recruitment

463 Participants were residents of the Denver, Colorado metropolitan area and the study was  
464 conducted at the Clinical Translational Research Center of the University of Colorado Hospital.  
465 The study was reviewed and approved by the Colorado Multiple Institutional Review Board and  
466 informed consent was obtained from all participants. For detailed criteria on recruitment of our  
467 five cohorts (HIV negative MSW; HIV negative MSM; HIV positive, ART naïve MSM; HIV positive  
468 ART-treated MSM with LD; and HIV positive ART-treated MSM without LD) see supplemental  
469 methods.

470

471 Feces, a fasting blood sample, and clinical surveys were collected from participants in order to  
472 obtain analytes for the study design outlined in Figure 3 (Supplemental Table 2). To evaluate  
473 metabolic health, we measured seven common clinical markers from fasting blood: triglycerides,  
474 glucose, insulin, LDL, HDL, leptin, and adiponectin. Additional information about relevant clinical  
475 measures such as probiotic use were also collected via a questionnaire and study participants  
476 also filled out information on typical frequency of high-risk sexual practices and on typical levels  
477 of gastrointestinal issues such as bloating, constipation, nausea and diarrhea.

478

### 479 Diet Data FFQ Collection

480 Typical dietary consumption over the prior year was collected using Diet History Questionnaire II  
481 (70). Diet composition was processed using the Diet\*Calc software and the  
482 dhq2.database.092914 database (71). All reported values are based on USDA nutrition  
483 guidelines. Reported dietary levels were normalized per 1000 kcal. To reduce the number of  
484 comparisons within the diet survey data, we binned highly co-correlating groups of measures  
485 within the data types into modules (Supplemental Table 3). These modules were defined using  
486 the tool, SCNIC (72).

487

488 Immune Data Collection

489 Whole blood was collected in sodium heparin vacutainers and centrifuged at 1700rpm for 10  
490 minutes for plasma collection. Plasma was aliquoted into 1mL microcentrifuge tubes and stored  
491 at -80. For ELISA preparation, plasma was thawed, kept cold, and centrifuged at 2000xg for 20  
492 minutes before ELISA plating. Markers for sCD14, sCD163, and FABP-2 were measured from  
493 plasma using standard ELISA kits from R&D Systems (DC140, DC1630 &DFBP20). Positive  
494 testing controls for each ELISA kit were also included (R&D Systems QC20, QC61, & QC213).  
495 LBP was measured by standard ELISA using Hycult Biotech kit HK315-02. Markers for IL-6, IL-  
496 10, TNF- $\alpha$ , MCP-1, and IL-22 were measured using Meso Scale Discovery's U-PLEX Biomarker  
497 Group 1 multiplex kit K15067L-1. Markers for SAA, VCAM-1, ICAM-1, and CRP were measured  
498 using Meso Scale Discovery's V-Plex Plus Vascular Injury Panel 2 multiplex kit K15198G-1.  
499 Vascular Injury Control Pack 1 C4198-1 was utilized as a positive control for this assay. Markers  
500 for GM-CSF, IL-7, IL-12/23p40, IL-15, IL-16, IL-17A, TNF- $\beta$ , and VEGF were measured using  
501 Meso Scale Discovery's V-Plex Plus Cytokine Panel 1 multiplex kit K151A0H-1. Cytokine Panel  
502 1 Control Pack C4050-1 was utilized as a positive control for this assay. Plasma samples were  
503 diluted per manufacturer's recommendation for all assays. Standard ELISA kit plates were  
504 measured using a Vmax® Kinetic Microplate Reader with Softmax® Pro Software from Molecular  
505 Devices LLC. Multiplex ELISA kits from Meso Scale Discovery were measured using the  
506 QuickPlex SQ 120 with Discovery Workbench 4.0 software.

507

508 Gnotobiotic Mouse Protocols

509 Germ-free C57/BL6 mice were purchased from Taconic and bred and maintained in flexible film  
510 isolator bubbles, fed with standard mouse chow. Three days before they were gavaged, male  
511 mice between 5-7 weeks of age were switched over to a western high-fat diet and were fed this  
512 diet for the remainder of the experiment. Diets were all obtained from Envigo (Indiana): Standard

513 chow - Teklad global soy protein-free extruded (item 2920X -  
514 <https://www.envigo.com/resources/data-sheets/2020x-datasheet-0915.pdf>), Western Diet – New  
515 Total Western Diet (item TD.110919). See Supplemental Table 10 for detailed diet composition.  
516 Mice were gavaged with 200  $\mu$ L of fecal solutions prepared from 1.5 g of donor feces mixed in 3  
517 mL of anaerobic PBS (19). Mice were housed individually following gavage for three weeks in a  
518 Tecniplast iso-positive caging system, with each cage having HEPA filters and positive  
519 pressurization for bioexclusion. Feces were collected from mice at day 21 for 16S rRNA gene  
520 sequencing. Mice were euthanized at 21 days post gavage using isoflurane overdose and all  
521 efforts were made to minimize suffering. Blood from euthanized animals was collected using  
522 cardiac puncture and cells were pelleted in K2-EDTA tubes; plasma was then aliquoted and  
523 stored at  $-80^{\circ}$  C.

524

## 525 Metabolomics Methods

### 526 *Plasma Sample Preparation*

527 A modified liquid-liquid extraction protocol was used to extract hydrophobic and hydrophilic  
528 compounds from the plasma samples (73). Briefly, 50  $\mu$ L of plasma spiked with internal standards  
529 underwent a protein crash with 250  $\mu$ L ice cold methanol. 750  $\mu$ L methyl tert-butyl ether (MTBE)  
530 and 650  $\mu$ L 25% methanol in water were added to extract the hydrophobic and hydrophilic  
531 compounds, respectively. 500  $\mu$ L of the upper hydrophobic layer and 400  $\mu$ L of the lower  
532 hydrophilic layer were transferred to separate autosampler vials and dried under nitrogen. The  
533 hydrophobic layer was reconstituted with 100  $\mu$ L of methanol and the hydrophilic layer was  
534 reconstituted with 50  $\mu$ L 5% acetonitrile in water. Both fractions were stored at  $-80^{\circ}$  C until LC/MS  
535 analysis.

536

### 537 *Liquid Chromatography Mass Spectrometry*



538 The hydrophobic fractions were analyzed using reverse phase chromatography on an Agilent  
539 Technologies (Santa Clara, CA) 1290 ultra-high precision liquid chromatography (UHPLC)  
540 system on an Agilent Zorbax Rapid Resolution HD SB-C18, 1.8 $\mu$ m (2.1 x 100mm) analytical  
541 column as previously described (73, 74). The hydrophilic fractions were analyzed using  
542 hydrophilic interaction liquid chromatography (HILIC) on a 1290 UHPLC system using an Agilent  
543 InfinityLab Poroshell 120 HILIC-Z (2.1 x 100mm) analytical column with gradient conditions as  
544 previously described (75) with mass spectrometry modifications as follows: nebulizer pressure:  
545 35psi, gas flow: 12L/min, sheath gas temperature: 275C, sheath gas flow: 12L/min, nozzle  
546 voltage: 250V, Fragmentor: 100V. The hydrophobic and hydrophilic fractions were run on Agilent  
547 Technologies (Santa Clara, CA) 6545 Quadrupole Time of Flight (QTOF) mass spectrometer.  
548 Both fractions were run in positive electrospray ionization (ESI) mode

549

#### 550 *Mass Spectrometry Data Processing*

551 Compound data was extracted using Agilent Technologies (Santa Clara, CA) MassHunter  
552 Profinder Version 10 software in combination with Agilent Technologies Mass Profiler  
553 Professional Version 14.9 (MPP) as described previously (40). Briefly, Batch Molecular Feature  
554 Extraction (BMFE) was used in Profinder to extract compound data from all samples and sample  
555 preparation blanks. The following BMFE parameters were used to group individual molecular  
556 features into compounds: charge state 1-2, with +H, +Na, +NH<sub>4</sub> and/or +K charge carriers. To  
557 reduce the presence of missing values, a theoretical mass and retention time database was  
558 generated for compounds present in samples only from a compound exchange format (.cef) file.  
559 This .cef file was then used to re-mine the raw sample data in Profinder using Batch Targeted  
560 Feature Extraction.

561

562 An in-house database containing KEGG, METLIN, Lipid Maps, and HMDB spectral data was used  
563 to putatively annotate metabolites based on accurate mass ( $\leq$  10 ppm), isotope ratios and isotopic

564 distribution. This corresponds to a Metabolomics Standards Initiative metabolite identification  
565 level three (76). To improve compound identification, statistically significant compounds  
566 underwent tandem MS using 10, 20, and 40V. Fragmentation patterns of identified compounds  
567 were matched to either NIST14 and NIST17 MSMS libraries, or to the *in silico* libraries, MetFrag  
568 (77) and Lipid Annotator 1.0 (Agilent) (78).

569

#### 570 *Microbiome-associated metabolites*

571 Microbiome-associated metabolites were defined using metabolites identified as significantly  
572 different in abundance between germ-free compared to humanized gnotobiotic mice and/or  
573 metabolites identified as microbially produced by the tool AMON (40).

574

575 For the gnotobiotic mouse analysis aqueous and lipid metabolites were analyzed separately (see  
576 mouse protocol above for details on experimental set-up). Metabolites that were present in <20%  
577 of samples were filtered out before analysis. Significant difference was determined using a  
578 Student's t-test with FDR p-value correction. FDR-corrected p values < 0.05 were deemed  
579 significant. Significant metabolites also present in the human samples were retained for further  
580 analysis.

581

582 For the AMON-identified metabolites, the tool used an inferred metagenome, which was  
583 calculated using the PICRUST2 QIIME2 plugin (42) and default parameters; a list of all identified  
584 KEGG IDs from the metabolite data (see metabolome methods); and KEGG flat files (downloaded  
585 2019/06/10). AMON determined metabolites observed that could be produced by the given  
586 genome. These metabolites were kept for analysis in addition to the gnotobiotic mouse identified  
587 metabolites. Those without any putative classification were removed from analysis.

588

#### 589 Microbiome Methods

590 *Sample Collection, Extraction, and Sequencing*

591 Stool samples were collected by the patient within 24 hours prior to their clinic visit on sterile  
592 swabs dipped into a full fecal sample deposited into a commode specimen collector. Samples  
593 were kept cold or frozen at -20°C during transport prior to being stored at -80°C. DNA was  
594 extracted using the standard DNeasy PowerSoil Kit protocol (Qiagen). Extracted DNA was PCR  
595 amplified with barcoded primers targeting the V4 region of 16S rRNA gene according to the Earth  
596 Microbiome Project 16S Illumina Amplicon protocol with the 515F:806R primer constructs (79).  
597 Control sterile swab samples that had undergone the same DNA extraction and PCR amplification  
598 procedures were also processed. Each PCR product was quantified using PicoGreen (Invitrogen),  
599 and equal amounts (ng) of DNA from each sample were pooled and cleaned using the UltraClean  
600 PCR Clean-Up Kit (MoBio). Sequences were generated on six runs on a MiSeq sequencing  
601 platform (Illumina, San Diego, CA).

602

603 *Microbiome Sequence Processing and Analysis*

604 Microbiome processing was performed using QIIME2 version 2018.8.0 (80). Data was sequenced  
605 across five sequencing runs. Each run was demultiplex and denoised separately using the  
606 DADA2 q2 plugin (81). Individual runs were then merged together and 99% *de novo* OTUs were  
607 defined using vSEARCH (82). Features were classified using the skLearn classifier in QIIME2  
608 with a classifier that was pre-trained on GreenGenes13\_8 (83). The phylogenetic tree was  
609 building using the SEPP plugin (84). Features that did not classify at the phylum level or were  
610 classified as mitochondria or chloroplast were filtered from the analysis. Samples were rarefied  
611 at 19,986 reads. To reduce the number of comparisons within the microbiome, we binned highly  
612 co-correlating groups of measures within the data types into modules (Supplemental Table 1).  
613 These modules were defined using the tool, SCNIC (72). For statistical analysis features present  
614 in <20% of samples were filtered out.

615

616 Bioinformatics

617 *Module definition*

618 Modules were called on microbiome and diet data. Modules were defined using the tool SCNIC  
619 (72). The q2-SCNIC plugin was used with default parameters for the microbiome data and  
620 standalone SCNIC was used for the diet data (<https://github.com/shafferm/SCNIC>). Specifically,  
621 for each data type SCNIC was used to first identify pairwise correlations between all features.  
622 Pearson correlation was used for diet and SparCC (85), which takes into account  
623 compositionality, was used for microbiome data to. Modules were then selected with a shared  
624 minimum distance (SMD) algorithm. The SMD method defines modules by first applying complete  
625 linkage hierarchical clustering to correlation coefficients to make a tree of features. Modules are  
626 defined as subtrees where all pairwise correlations between all pairs of tips have an R value  
627 greater than defined minimum. The diet modules were defined using a Pearson  $r^2$  cutoff of 0.75.  
628 The microbiome modules were defined using a SparCC minimum r cutoff of 0.35. To summarize  
629 modules SCNIC uses a simple summation of count data from all features in a module. Application  
630 of SCNIC reduced the number of evaluated features from 6,913 to 6,818 for microbiome and 59  
631 to 29 for diet data.

632

633 *Statistical Analysis*

634 All statistics were performed in R. For non-parametric tests Spearman rank correlation and  
635 Kruskal-Wallis test were used. For parametric tests linear models and Student's t-test were used.

636

637 *Data analysis tools*

638 Metabolic disease score was calculated using PCA in R with prcomp. Data was scaled using  
639 default method within the prcomp library. All random forest analysis tools were used in R.  
640 Standard random forest was performed using randomForest. Variable selection was performed  
641 in R using the tool VSURF (35). Interaction analysis was performed in R using the tool iRF (39).

642

643 Data Availability

644 All data will be publicly available upon publishing. Microbiome data in QIITA  
645 (<https://qiita.ucsd.edu>) Study ID 13338 and available upon request and will be publicly available  
646 in EBI/ENA (<https://www.ebi.ac.uk/ena>) upon publishing. Immune and diet data are available  
647 along with the microbiome data as associated metadata. Metabolomics data will be available on  
648 Metabolomic Workbench (<https://www.metabolomicsworkbench.org>) upon publishing. Until  
649 publicly available it is available upon request.

650

651 **Statements**

652 Acknowledgements

653 We would like to thank our study participants for contributing their samples and time to this study.  
654 We would also like to thank Christine Griesmer for her contributions to subject recruitment and  
655 Brandi Wagner and Maggie Stanislawski for insights into statistical analysis methods.

656

657 Funding sources

658 This work was funded by R01 DK104047 and R01 DK108366 with additional support from  
659 NIH/NCATS Colorado CTSA Grant Number UL1 TR002535. High performance computing was  
660 supported by a cluster at the University of Colorado Boulder funded by National Institutes of  
661 Health 1S10OD012300. AJS Armstrong was supported by T32 AI052066. Contents are the  
662 authors' sole responsibility and do not necessarily represent official NIH views.

663

664 Declarations of interests

665 The authors declare that they have no conflicts of interest.

666

667 Author contributions

668 AJSA analyzed and interpreted all data. AJSA and CAL wrote the manuscript. NR guided  
669 generation and interpretation of metabolomics data. KQ and KAD prepared, ran, and processed  
670 metabolomics. KQ ran metabolic pathway analysis. SXL prepared and conducted mouse  
671 experiments. JMS ran immunological assays. NMN prepared and ran sequencing and  
672 coordinated fecal sample and metadata collection from study subjects. SF recruited subjects,  
673 collected samples, and maintained regulatory compliance. TJM and JH collected and aided in  
674 interpretation and processing of diet data. CAL, BEP, and TC conceptualized and led the study. TC  
675 guided all clinical data collection and subject recruitment and provided clinical insight into study  
676 populations. BEP guided generation and interpretation of immune data. CAL guided microbiome  
677 data generation and multi'omic data analysis. All authors read and approved the final manuscript.

678 **Supplemental Tables**

679 **Supplemental Table 1.** Microbiome modules calculated by SCNIC

680

681 **Supplemental Table 2.** Study measures by datatype

682

683 **Supplemental Table 3.** Diet survey data modules calculated by SCNIC

684

685 **Supplemental Table 4.** VSURF-selected features and correlation with metabolic disease score

686

687 **Supplemental Table 5.** Edge table for VSURF-selected inter-variable correlations

688

689 **Supplemental Table 6.** Gnotobiotic mouse experiment set-up

690

691 **Supplemental Table 7.** Microbiome-associated metabolites list and source of identification

692

693 **Supplemental Table 8.** Metabolites correlating with metabolic score

694

695 **Supplemental Table 9.** mBrole pathway analysis results

696

697 **Supplemental Table 10.** Western diet for gnotobiotic mice

698 **Supplemental Figures**

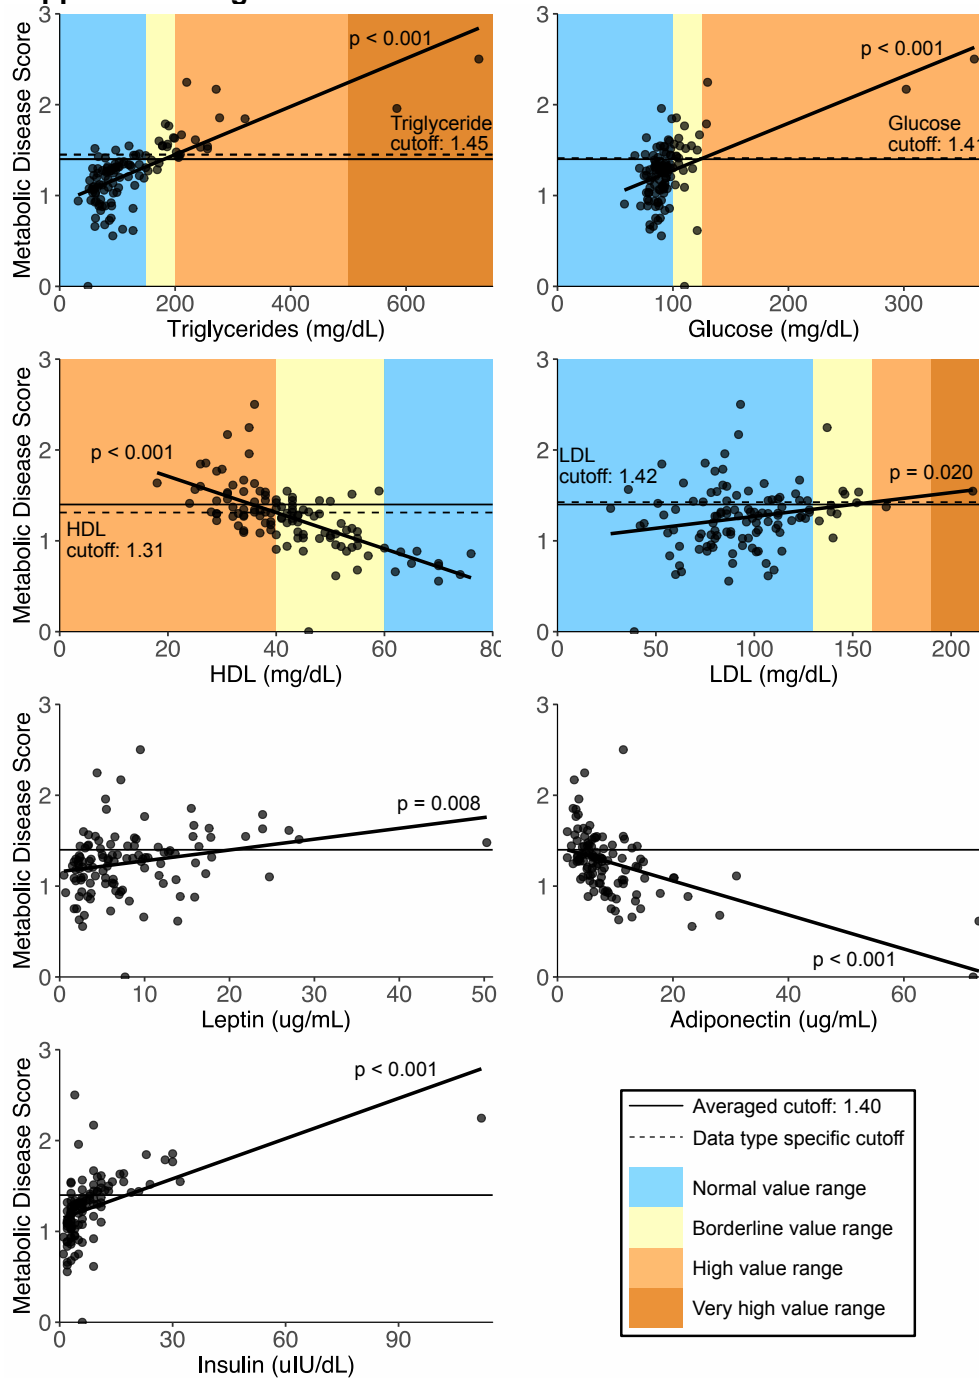

699 **Supplemental Figure 1. Metabolic Score Cutoff Calculations using regressions between**  
700 **metabolic disease score and the metrics used in the PCA analysis.** Triglycerides, fasting  
701 glucose, HDL and LDL have well-define clinical cut-offs for high values and were used to calculate  
702 the healthy-unhealth cutoff. Linear model was calculated modeling metabolic disease score by  
703 each marker. The high value intercept of the regression line is marked with a dotted line and value  
704 annotated on the plot. The solid line is the defined healthy-unhealthy cutoff calculated as the  
705 mean of the four cutoff values. P values are from the linear model.  
706



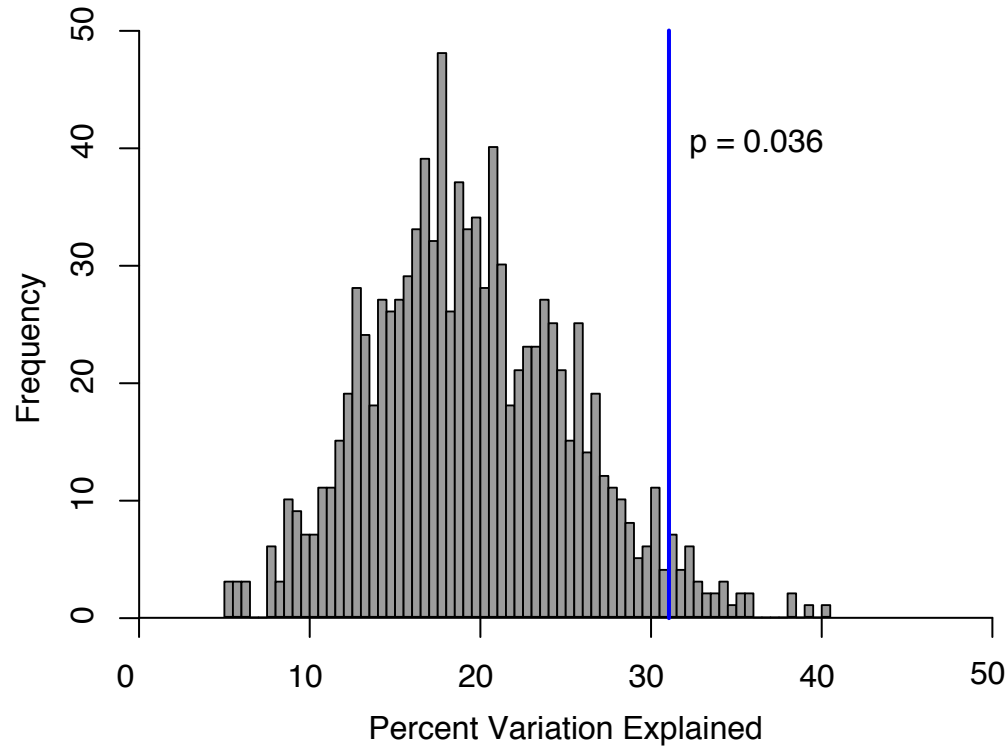

707  
708 **Supplemental Figure 2. Histogram of percent variation explained in permuted VSURF.**  
709 Metabolic disease score was permuted 1,000 times and passed through VSURF. The resulting  
710 variables were run through a standard random forest and the percent variation explained was  
711 calculated. The blue line represents the percent variation explained for the true VSURF. P value  
712 was calculated using a one tailed test.

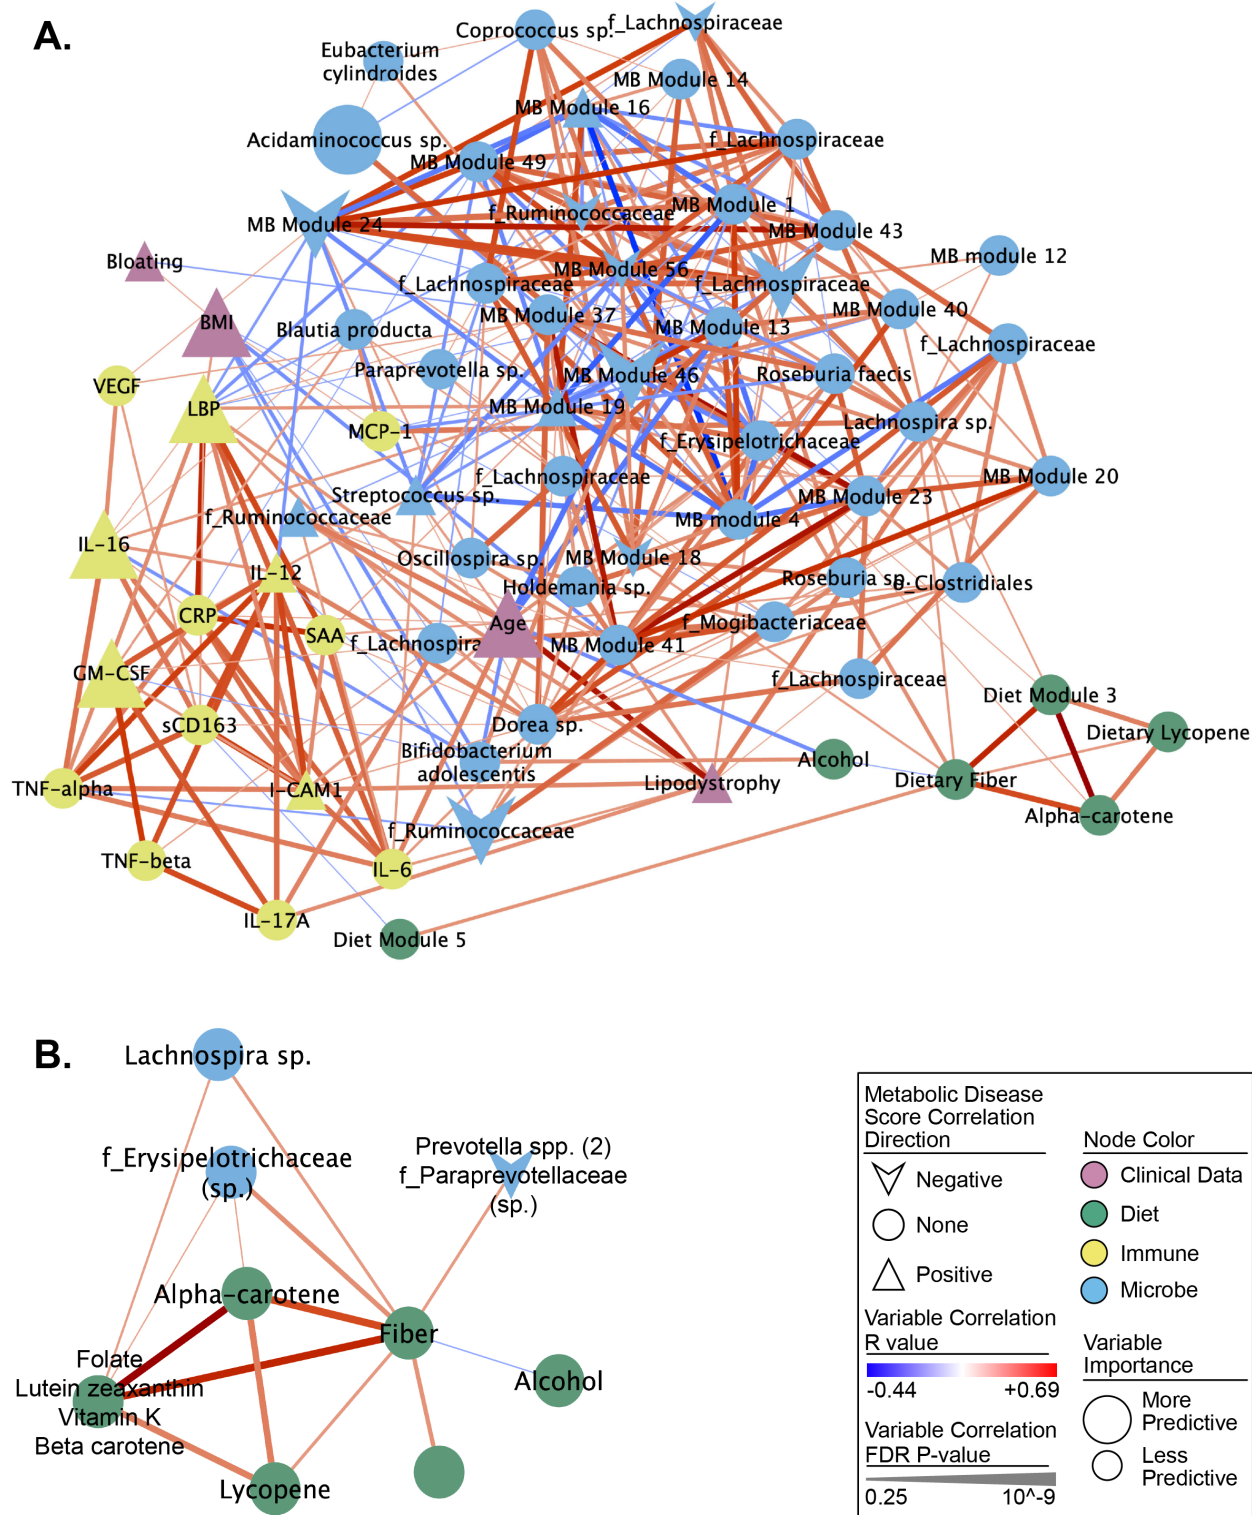

713  
714 **Supplemental Figure 3. Correlation network of VSURF-selected variables.** Correlation  
715 network of **A)** all VSURF-selected variables and **B)** neighboring nodes of dietary fiber. All  
716 Spearman rank correlations with an FDR  $p < 0.25$  are shown. See Supplemental Table 5 for the  
717 edge table and Supplemental Table 4 for the node table.

718 **References**

- 719
- 720 1. Non LR, Escota GV, Powderly WG. 2016. HIV and its relationship to insulin resistance  
721 and lipid abnormalities. *Translational Research* 183:41-56.
- 722 2. Nix LM, Tien PC. 2014. Metabolic syndrome, diabetes, and cardiovascular risk in HIV.  
723 *Curr HIV/AIDS Rep* 11:271-8.
- 724 3. Lake JE, Li X, Palella FJ, Jr., Erlandson KM, Wiley D, Kingsley L, Jacobson LP, Brown  
725 TT. 2018. Metabolic health across the BMI spectrum in HIV-infected and HIV-uninfected  
726 men. *AIDS* 32:49-57.
- 727 4. Willig AL, Overton ET. 2016. Metabolic Complications and Glucose Metabolism in HIV  
728 Infection: A Review of the Evidence. *Curr HIV/AIDS Rep* 13:289-96.
- 729 5. Monczor AN, Li X, Palella FJ, Jr., Erlandson KM, Wiley D, Kingsley LA, Post WS,  
730 Jacobson LP, Brown TT, Lake JE. 2018. Systemic Inflammation Characterizes Lack of  
731 Metabolic Health in Nonobese HIV-Infected Men. *Mediators Inflamm* 2018:5327361.
- 732 6. Funderburg NT, Mehta NN. 2016. Lipid Abnormalities and Inflammation in HIV Infection.  
733 *Curr HIV/AIDS Rep* 13:218-25.
- 734 7. Beltran LM, Rubio-Navarro A, Amaro-Villalobos JM, Egido J, Garcia-Puig J, Moreno JA.  
735 2015. Influence of immune activation and inflammatory response on cardiovascular risk  
736 associated with the human immunodeficiency virus. *Vasc Health Risk Manag* 11:35-48.
- 737 8. Tsiodras S, Mantzoros C, Hammer S, Samore M. 2000. Effects of Protease Inhibitors on  
738 Hyperglycemia, Hyperlipidemia, and Lipodystrophy A 5-Year Cohort Study. *Arch Intern*  
739 *Med* 160:2050-2056.
- 740 9. Galescu O, Bhangoo A, Ten S. 2013. Insulin resistance, lipodystrophy and  
741 cardiometabolic syndrome in HIV/AIDS. *Reviews in Endocrine and Metabolic Disorders*  
742 14:133-140.
- 743 10. Tilg H, Kaser A. 2011. Gut microbiome, obesity, and metabolic dysfunction. *The Journal*  
744 *of Clinical Investigation* 121:2126-2132.
- 745 11. Sonnenburg JL, Bäckhed F. 2016. Diet–microbiota interactions as moderators of human  
746 metabolism. *Nature* 535:56-64.
- 747 12. Pedersen HK, Gudmundsdottir V, Nielsen HB, Hyotylainen T, Nielsen T, Jensen BA,  
748 Forslund K, Hildebrand F, Prifti E, Falony G, Le Chatelier E, Levenez F, Dore J, Mattila I,  
749 Plichta DR, Poho P, Hellgren LI, Arumugam M, Sunagawa S, Vieira-Silva S, Jorgensen  
750 T, Holm JB, Trost K, Meta HITC, Kristiansen K, Brix S, Raes J, Wang J, Hansen T, Bork  
751 P, Brunak S, Oresic M, Ehrlich SD, Pedersen O. 2016. Human gut microbes impact host  
752 serum metabolome and insulin sensitivity. *Nature* 535:376-81.
- 753 13. Matey-Hernandez ML, Williams FMK, Potter T, Valdes AM, Spector TD, Menni C. 2018.  
754 Genetic and microbiome influence on lipid metabolism and dyslipidemia. *Physiol*  
755 *Genomics* 50:117-126.
- 756 14. Karlsson F, Tremaroli V, Nielsen J, Bäckhed F. 2013. Assessing the human gut  
757 microbiota in metabolic diseases. *Diabetes* 62:3341-9.
- 758 15. Neff CP, Krueger O, Xiong K, Arif S, Nusbacher N, Schneider JM, Cunningham AW,  
759 Armstrong A, Li S, McCarter MD, Campbell TB, Lozupone CA, Palmer BE. 2018. Fecal  
760 Microbiota Composition Drives Immune Activation in HIV-infected Individuals.  
761 *EBioMedicine* 30:192-202.
- 762 16. Armstrong AJS, Shaffer M, Nusbacher NM, Griesmer C, Fiorillo S, Schneider JM,  
763 Preston Neff C, Li SX, Fontenot AP, Campbell T, Palmer BE, Lozupone CA. 2018. An  
764 exploration of Prevotella-rich microbiomes in HIV and men who have sex with men.  
765 *Microbiome* 6:198.
- 766 17. Vujkovic-Cvijin I, Somsouk M. 2019. HIV and the Gut Microbiota: Composition,  
767 Consequences, and Avenues for Amelioration. *Curr HIV/AIDS Rep* doi:10.1007/s11904-  
768 019-00441-w.

- 769 18. Noguera-Julian M, Rocafort M, Guillén Y, Rivera J, Casadellà M, Nowak P, Hildebrand  
770 F, Zeller G, Parera M, Bellido R, Rodríguez C, Carrillo J, Mothe B, Coll J, Bravo I,  
771 Estany C, Herrero C, Saz J, Sirera G, Torrela A, Navarro J, Crespo M, Brander C,  
772 Negro E, Blanco J, Guarner F, Calle ML, Bork P, Sönnernborg A, Clotet B, Paredes R.  
773 2016. Gut Microbiota Linked to Sexual Preference and HIV Infection. *EBioMedicine*  
774 5:135-46.
- 775 19. Li SX, Sen S, Schneider JM, Xiong KN, Nusbacher NM, Moreno-Huizar N, Shaffer M,  
776 Armstrong AJS, Severs E, Kuhn K, Neff CP, McCarter M, Campbell T, Lozupone CA,  
777 Palmer BE. 2019. Gut microbiota from high-risk men who have sex with men drive  
778 immune activation in gnotobiotic mice and in vitro HIV infection. *PLoS Pathog*  
779 15:e1007611.
- 780 20. Cui HL, Ditiatkovski M, Kesani R, Bobryshev YV, Liu Y, Geyer M, Mukhamedova N,  
781 Bukrinsky M, Sviridov D. 2014. HIV protein Nef causes dyslipidemia and formation of  
782 foam cells in mouse models of atherosclerosis. *FASEB Journal* 28:2828-2839.
- 783 21. Auclair M, Guenantin AC, Fellahi S, Garcia M, Capeau J. 2020. HIV antiretroviral drugs,  
784 dolutegravir, maraviroc and ritonavir-boosted atazanavir use different pathways to affect  
785 inflammation, senescence and insulin sensitivity in human coronary endothelial cells.  
786 *PLoS One* 15:e0226924.
- 787 22. Ahmed D, Roy D, Cassol E. 2018. Examining Relationships between Metabolism and  
788 Persistent Inflammation in HIV Patients on Antiretroviral Therapy. *Mediators Inflamm*  
789 2018:6238978.
- 790 23. Reid M, Ma Y, Scherzer R, Price JC, French AL, Plankey MW, Grunfeld C, Tien PC.  
791 2017. Higher CD163 levels are associated with insulin resistance in hepatitis C virus-  
792 infected and HIV-infected adults. *AIDS* 31:385-393.
- 793 24. Somsouk M, Estes JD, Deleage C, Dunham RM, Albright R, Inadomi JM, Martin JN,  
794 Deeks SG, McCune JM, Hunt PW. 2015. Gut epithelial barrier and systemic  
795 inflammation during chronic HIV infection. *AIDS (London, England)* 29:43-51.
- 796 25. Klase Z, Ortiz A, Deleage C, Mudd JC, Quiñones M, Schwartzman E, Klatt NR, Canary  
797 L, Estes JD, Brenchley JM. 2015. Dysbiotic bacteria translocate in progressive SIV  
798 infection. *Mucosal Immunology* 8:1009-1020.
- 799 26. Palmer CD, Tomassilli J, Sirignano M, Romero-Tejeda M, Arnold KB, Che D,  
800 Lauffenburger DA, Jost S, Allen T, Mayer KH, Altfeld M. 2014. Enhanced immune  
801 activation linked to endotoxemia in HIV-1 seronegative MSM. *AIDS* 28:2162-6.
- 802 27. Lim PS, Chang YK, Wu TK. 2019. Serum Lipopolysaccharide-Binding Protein is  
803 Associated with Chronic Inflammation and Metabolic Syndrome in Hemodialysis  
804 Patients. *Blood Purif* 47:28-36.
- 805 28. Hersoug LG, Moller P, Loft S. 2018. Role of microbiota-derived lipopolysaccharide in  
806 adipose tissue inflammation, adipocyte size and pyroptosis during obesity. *Nutr Res Rev*  
807 31:153-163.
- 808 29. Awoyemi A, Troseid M, Arnesen H, Solheim S, Seljeflot I. 2018. Markers of metabolic  
809 endotoxemia as related to metabolic syndrome in an elderly male population at high  
810 cardiovascular risk: a cross-sectional study. *Diabetol Metab Syndr* 10:59.
- 811 30. Liu X, Lu L, Yao P, Ma Y, Wang F, Jin Q, Ye X, Li H, Hu FB, Sun L, Lin X. 2014.  
812 Lipopolysaccharide binding protein, obesity status and incidence of metabolic syndrome:  
813 a prospective study among middle-aged and older Chinese. *Diabetologia* 57:1834-41.
- 814 31. Gelpi M, Vestad B, Hansen SH, Holm K, Drivsholm N, Goetz A, Kirkby NS, Lindegaard  
815 B, Lebech AM, Hoel H, Michelsen AE, Ueland T, Gerstoft J, Lundgren J, Hov JR,  
816 Nielsen SD, Troseid M. 2020. Impact of Hiv-Related Gut Microbiota Alterations on  
817 Metabolic Comorbidities. *Clin Infect Dis* doi:10.1093/cid/ciz1235.
- 818 32. Hammer SM, Sobieszczyk ME, Janes H, Karuna ST, Mulligan MJ, Grove D, Koblin BA,  
819 Buchbinder SP, Keefer MC, Tomaras GD, Frahm N, Hural J, Anude C, Graham BS,

- 820 Enama ME, Adams E, DeJesus E, Novak RM, Frank I, Bentley C, Ramirez S, Fu R,  
821 Koup RA, Mascola JR, Nabel GJ, Montefiori DC, Kublin J, McElrath MJ, Corey L, Gilbert  
822 PB, Team HS. 2013. Efficacy trial of a DNA/rAd5 HIV-1 preventive vaccine. *N Engl J*  
823 *Med* 369:2083-92.
- 824 33. Wiley JF, Carrington MJ. 2016. A metabolic syndrome severity score: A tool to quantify  
825 cardio-metabolic risk factors. *Prev Med* 88:189-95.
- 826 34. Hillier TA, Rousseau A, Lange C, Lepinay P, Cailleau M, Novak M, Calliez E,  
827 Ducimetiere P, Balkau B, Cohort DESIR. 2006. Practical way to assess metabolic  
828 syndrome using a continuous score obtained from principal components analysis.  
829 *Diabetologia* 49:1528-35.
- 830 35. Genuer R, Poggi J-M, Tuleau-Malot C. 2015. VSURF: An R Package for Variable  
831 Selection Using Random Forests. *The R Journal, R Foundation for Statistical Computing*  
832 7:12-33.
- 833 36. Marchetti G, Tincati C, Silvestri G. 2013. Microbial translocation in the pathogenesis of  
834 HIV infection and AIDS. *Clinical microbiology reviews* 26:2-18.
- 835 37. Duncan SH, Holtrop G, Lobley GE, Calder AG, Stewart CS, Flint HJ. 2004. Contribution  
836 of acetate to butyrate formation by human faecal bacteria. *Br J Nutr* 91:915-23.
- 837 38. Duncan SH, Barcenilla A, Stewart CS, Pryde SE, Flint HJ. 2002. Acetate utilization and  
838 butyryl coenzyme A (CoA):acetate-CoA transferase in butyrate-producing bacteria from  
839 the human large intestine. *Appl Environ Microbiol* 68:5186-90.
- 840 39. Basu S, Kumbier K, Brown JB, Yu B. 2018. Iterative random forests to discover  
841 predictive and stable high-order interactions. *Proc Natl Acad Sci U S A* 115:1943-1948.
- 842 40. Shaffer M, Thurimella K, Quinn K, Doenges K, Zhang X, Bokatzian S, Reisdorph N,  
843 Lozupone CA. 2019. AMON: annotation of metabolite origins via networks to integrate  
844 microbiome and metabolome data. *BMC Bioinformatics* 20:614.
- 845 41. Kanehisa M, Furumichi M, Tanabe M, Sato Y, Morishima K. 2017. KEGG: new  
846 perspectives on genomes, pathways, diseases and drugs. *Nucleic Acids Research*  
847 45:D353-D361.
- 848 42. Douglas GM, Maffei VJ, Zaneveld J, Yurgel SN, Brown JR, Taylor CM, Huttenhower C,  
849 Langille MGI. 2020. PICRUSt2: An improved and extensible approach for metagenome  
850 inference. doi:10.1101/672295.
- 851 43. Frolkis A, Knox C, Lim E, Jewison T, Law V, Hau DD, Liu P, Gautam B, Ly S, Guo AC,  
852 Xia J, Liang Y, Shrivastava S, Wishart DS. 2010. SMPDB: The Small Molecule Pathway  
853 Database. *Nucleic Acids Res* 38:D480-7.
- 854 44. van der Veen JN, Kennelly JP, Wan S, Vance JE, Vance DE, Jacobs RL. 2017. The  
855 critical role of phosphatidylcholine and phosphatidylethanolamine metabolism in health  
856 and disease. *Biochim Biophys Acta Biomembr* 1859:1558-1572.
- 857 45. Verhaegen P, Borchelt M, Smith J. 2003. Relation between cardiovascular and  
858 metabolic disease and cognition in very old age: cross-sectional and longitudinal findings  
859 from the berlin aging study. *Health Psychol* 22:559-69.
- 860 46. Montessori V, Press N, Harris M, Akagi L, Montaner JSG. 2004. Adverse effects of  
861 antiretroviral therapy for HIV infection. *CMAJ : Canadian Medical Association journal =*  
862 *journal de l'Association medicale canadienne* 170:229-38.
- 863 47. Alexander CM, Landsman PB, Teutsch SM, Haffner SM, Third National H, Nutrition  
864 Examination S, National Cholesterol Education P. 2003. NCEP-defined metabolic  
865 syndrome, diabetes, and prevalence of coronary heart disease among NHANES III  
866 participants age 50 years and older. *Diabetes* 52:1210-4.
- 867 48. Meigs JB. 2003. Epidemiology of the insulin resistance syndrome. *Curr Diab Rep* 3:73-9.
- 868 49. Kerchberger AM, Sheth AN, Angert CD, Mehta CC, Summers NA, Ofotokun I, Gustafson  
869 D, Weiser SD, Sharma A, Adimora AA, French AL, Augenbraun M, Cocohoba J,  
870 Kassaye S, Bolivar H, Govindarajulu U, Konkle-Parker D, Golub ET, Lahiri CD. 2019.

- 871 Weight Gain Associated with Integrase Stand Transfer Inhibitor Use in Women. Clin  
872 Infect Dis doi:10.1093/cid/ciz853.
- 873 50. Venter WDF, Moorhouse M, Sokhela S, Fairlie L, Mashabane N, Masenya M, Serenata  
874 C, Akpomiemie G, Qavi A, Chandiwana N, Norris S, Chersich M, Clayden P, Abrams E,  
875 Arulappan N, Vos A, McCann K, Simmons B, Hill A. 2019. Dolutegravir plus Two  
876 Different Prodrugs of Tenofovir to Treat HIV. *N Engl J Med* 381:803-815.
- 877 51. Pérez-Matute P, Pérez-Martínez L, Aguilera-Lizarraga J, Blanco JR, Oteo JA. 2015.  
878 Maraviroc modifies gut microbiota composition in a mouse model of obesity: a plausible  
879 therapeutic option to prevent metabolic disorders in HIV-infected patients. *Revista*  
880 *española de quimioterapia* : publicación oficial de la Sociedad Española de  
881 *Quimioterapia* 28:200-6.
- 882 52. Han GM, Meza JL, Soliman GA, Islam KM, Watanabe-Galloway S. 2016. Higher levels  
883 of serum lycopene are associated with reduced mortality in individuals with metabolic  
884 syndrome. *Nutr Res* 36:402-7.
- 885 53. Zeng YC, Peng LS, Zou L, Huang SF, Xie Y, Mu GP, Zeng XH, Zhou XL, Zeng YC.  
886 2017. Protective effect and mechanism of lycopene on endothelial progenitor cells  
887 (EPCs) from type 2 diabetes mellitus rats. *Biomed Pharmacother* 92:86-94.
- 888 54. Sluijs I, Beulens JW, Grobbee DE, van der Schouw YT. 2009. Dietary carotenoid intake  
889 is associated with lower prevalence of metabolic syndrome in middle-aged and elderly  
890 men. *J Nutr* 139:987-92.
- 891 55. Kovatcheva-Datchary P, Nilsson A, Akrami R, Lee Ying S, De Vadder F, Arora T, Hallen  
892 A, Martens E, Björck I, Bäckhed F. 2015. Dietary Fiber-Induced Improvement in Glucose  
893 Metabolism Is Associated with Increased Abundance of *Prevotella*. *Cell Metabolism*  
894 22:971-982.
- 895 56. O'Keefe SJD, Li JV, Lahti L, Ou J, Carbonero F, Mohammed K, Posma JM, Kinross J,  
896 Wahl E, Ruder E, Vippera K, Naidoo V, Mtshali L, Tims S, Puylaert PGB, DeLany J,  
897 Krasinskas A, Benefiel AC, Kaseb HO, Newton K, Nicholson JK, de Vos WM, Gaskins  
898 HR, Zoetendal EG. 2015. Fat, fibre and cancer risk in African Americans and rural  
899 Africans. *Nature communications* 6:6342.
- 900 57. Schröder NWJ, Schumann RR. 2016. Non-LPS targets and actions of LPS binding  
901 protein (LBP). *Journal of Endotoxin Research* 11:237-242.
- 902 58. Boulangé CL, Neves AL, Chilloux J, Nicholson JK, Dumas M-E. 2016. Impact of the gut  
903 microbiota on inflammation, obesity, and metabolic disease. *Genome Medicine* 8:42.
- 904 59. Brake DK, Smith EO, Mersmann H, Smith CW, Robker RL. 2006. ICAM-1 expression in  
905 adipose tissue: effects of diet-induced obesity in mice. *Am J Physiol Cell Physiol*  
906 291:C1232-9.
- 907 60. Hsu LA, Chang CJ, Wu S, Teng MS, Chou HH, Chang HH, Chang PY, Ko YL. 2010.  
908 Association between functional variants of the ICAM1 and CRP genes and metabolic  
909 syndrome in Taiwanese subjects. *Metabolism* 59:1710-6.
- 910 61. Senn JJ, Klover PJ, Nowak IA, Mooney RA. 2002. Interleukin-6 induces cellular insulin  
911 resistance in hepatocytes. *Diabetes* 51:3391-9.
- 912 62. Reigstad CS, Lunden GO, Felin J, Backhed F. 2009. Regulation of serum amyloid A3  
913 (SAA3) in mouse colonic epithelium and adipose tissue by the intestinal microbiota.  
914 *PLoS One* 4:e5842.
- 915 63. Cani PD, Bibiloni R, Knauf C, Waget A, Neyrinck AM, Delzenne NM, Burcelin R. 2008.  
916 Changes in gut microbiota control metabolic endotoxemia-induced inflammation in high-  
917 fat diet-induced obesity and diabetes in mice. *Diabetes* 57:1470-81.
- 918 64. Tilves CM, Zmuda JM, Kuipers AL, Nestlerode CS, Evans RW, Bunker CH, Patrick AL,  
919 Miljkovic I. 2016. Association of Lipopolysaccharide-Binding Protein With Aging-Related  
920 Adiposity Change and Prediabetes Among African Ancestry Men. *Diabetes Care* 39:385-  
921 91.

- 922 65. Moreau RA, Agnew J, Hicks KB, Powell MJ. 1997. Modulation of lipoxygenase activity  
923 by bacterial hopanoids. *J Nat Prod* 60:397-8.
- 924 66. Tsai IJ, Croft KD, Mori TA, Falck JR, Beilin LJ, Puddey IB, Barden AE. 2009. 20-HETE  
925 and F2-isoprostanes in the metabolic syndrome: the effect of weight reduction. *Free*  
926 *Radic Biol Med* 46:263-70.
- 927 67. Raza GS, Putaala H, Hibberd AA, Alhoniemi E, Tiihonen K, Makela KA, Herzig KH.  
928 2017. Polydextrose changes the gut microbiome and attenuates fasting triglyceride and  
929 cholesterol levels in Western diet fed mice. *Sci Rep* 7:5294.
- 930 68. Rabot S, Membrez M, Bruneau A, Gérard P, Harach T, Moser M, Raymond F,  
931 Mansourian R, Chou CJ. 2010. Germ-free C57BL/6J mice are resistant to high-fat-diet-  
932 induced insulin resistance and have altered cholesterol metabolism. *FASEB journal* :  
933 official publication of the Federation of American Societies for Experimental Biology  
934 24:4948-59.
- 935 69. Velagapudi VR, Hezaveh R, Reigstad CS, Gopalacharyulu P, Yetukuri L, Islam S, Felin  
936 J, Perkins R, Boren J, Oresic M, Backhed F. 2010. The gut microbiota modulates host  
937 energy and lipid metabolism in mice. *J Lipid Res* 51:1101-12.
- 938 70. National Institutes of Health EaGRP, National Cancer Institute. 2010. Diet History  
939 Questionnaire, Version 2.0.
- 940 71. National Cancer Institute EaGRP. 2012. Diet\*Calc Analysis Program, Version 1.5.0. .
- 941 72. Shaffer M. SCNIC: Sparse Cooccurrence Network Investigation for Compositional data.  
942 <https://github.com/shafferm/SCNIC>. Accessed
- 943 73. Yang Y, Cruickshank C, Armstrong M, Mahaffey S, Reisdorph R, Reisdorph N. 2013.  
944 New sample preparation approach for mass spectrometry-based profiling of plasma  
945 results in improved coverage of metabolome. *J Chromatogr A* 1300:217-26.
- 946 74. Halper-Stromberg E, Gillenwater L, Cruickshank-Quinn C, O'Neal WK, Reisdorph N,  
947 Petrache I, Zhuang Y, Labaki WW, Curtis JL, Wells J, Rennard S, Pratte KA, Woodruff  
948 P, Stringer KA, Kechris K, Bowler RP. 2019. Bronchoalveolar Lavage Fluid from COPD  
949 Patients Reveals More Compounds Associated with Disease than Matched Plasma.  
950 *Metabolites* 9.
- 951 75. Kennedy A, Bivens A. 2017. Methods for the Analysis of Underivatized Amino Acids by  
952 LC/MS: For Food, Life Science, and Metabolomics Applications, Agilent Application  
953 Note.
- 954 76. Sumner LW, Amberg A, Barrett D, Beale MH, Beger R, Daykin CA, Fan TW, Fiehn O,  
955 Goodacre R, Griffin JL, Hankemeier T, Hardy N, Harnly J, Higashi R, Kopka J, Lane AN,  
956 Lindon JC, Marriott P, Nicholls AW, Reilly MD, Thaden JJ, Viant MR. 2007. Proposed  
957 minimum reporting standards for chemical analysis Chemical Analysis Working Group  
958 (CAWG) Metabolomics Standards Initiative (MSI). *Metabolomics* 3:211-221.
- 959 77. Ruttkies C, Schymanski EL, Wolf S, Hollender J, Neumann S. 2016. MetFrag  
960 relaunched: incorporating strategies beyond in silico fragmentation. *J Cheminform* 8:3.
- 961 78. Agilent. 2020. Lipidomics Analysis with Lipid Annotator and Mass Profiler Professional,  
962 vol 5994-1111EN., Technical Overview.
- 963 79. Thompson LR, Sanders JG, McDonald D, Amir A, Ladau J, Locey KJ, Prill RJ, Tripathi  
964 A, Gibbons SM, Ackermann G, Navas-Molina JA, Janssen S, Kopylova E, Vazquez-  
965 Baeza Y, Gonzalez A, Morton JT, Mirarab S, Zech Xu Z, Jiang L, Haroon MF, Kanbar J,  
966 Zhu Q, Jin Song S, Kosciolk T, Bokulich NA, Lefler J, Brislawn CJ, Humphrey G,  
967 Owens SM, Hampton-Marcell J, Berg-Lyons D, McKenzie V, Fierer N, Fuhrman JA,  
968 Clauset A, Stevens RL, Shade A, Pollard KS, Goodwin KD, Jansson JK, Gilbert JA,  
969 Knight R, Earth Microbiome Project C. 2017. A communal catalogue reveals Earth's  
970 multiscale microbial diversity. *Nature* 551:457-463.
- 971 80. Bolyen E, Rideout JR, Dillon MR, Bokulich NA, Abnet CC, Al-Ghalith GA, Alexander H,  
972 Alm EJ, Arumugam M, Asnicar F, Bai Y, Bisanz JE, Bittinger K, Brejnrod A, Brislawn CJ,

- 973 Brown CT, Callahan BJ, Caraballo-Rodriguez AM, Chase J, Cope EK, Da Silva R,  
974 Diener C, Dorrestein PC, Douglas GM, Durall DM, Duvall C, Edwardson CF, Ernst M,  
975 Estaki M, Fouquier J, Gauglitz JM, Gibbons SM, Gibson DL, Gonzalez A, Gorlick K, Guo  
976 J, Hillmann B, Holmes S, Holste H, Huttenhower C, Huttley GA, Janssen S, Jarmusch  
977 AK, Jiang L, Kaehler BD, Kang KB, Keefe CR, Keim P, Kelley ST, Knights D, et al. 2019.  
978 Reproducible, interactive, scalable and extensible microbiome data science using QIIME  
979 2. *Nat Biotechnol* 37:852-857.
- 980 81. Callahan BJ, McMurdie PJ, Rosen MJ, Han AW, Johnson AJ, Holmes SP. 2016.  
981 DADA2: High-resolution sample inference from Illumina amplicon data. *Nat Methods*  
982 13:581-3.
- 983 82. Rognes T, Flouri T, Nichols B, Quince C, Mahe F. 2016. VSEARCH: a versatile open  
984 source tool for metagenomics. *PeerJ* 4:e2584.
- 985 83. McDonald D, Price MN, Goodrich J, Nawrocki EP, DeSantis TZ, Probst A, Andersen GL,  
986 Knight R, Hugenholtz P. 2012. An improved Greengenes taxonomy with explicit ranks  
987 for ecological and evolutionary analyses of bacteria and archaea. *The ISME journal*  
988 6:610-8.
- 989 84. Janssen S, McDonald D, Gonzalez A, Navas-Molina JA, Jiang L, Xu ZZ, Winker K, Kado  
990 DM, Orwoll E, Manary M, Mirarab S, Knight R. 2018. Phylogenetic Placement of Exact  
991 Amplicon Sequences Improves Associations with Clinical Information. *mSystems* 3.
- 992 85. Friedman J, Alm EJ. 2012. Inferring correlation networks from genomic survey data.  
993 *PLoS Comput Biol* 8:e1002687.
- 994
